# Supplementary material for: An updated seabed bathymetry beneath Larsen C Ice Shelf, Antarctic Peninsula
Source: Copernicus journal article supplement (doi:10.5194/essd-12-887-2020), 2020-04-20
Supplement: Supplementary file 1 [file essd-12-887-2020-supplement.zip]

Archive with 2 entries (2 files):
- essd-12-887-2020-supplement-title-page.pdf
- Supplement1-Bathymetry_WGS84_AntarcticPolarStereo.csv
