# Supplementary material for: An updated seabed bathymetry beneath Larsen C Ice Shelf, Antarctic Peninsula
Source: Copernicus journal article supplement (doi:10.5194/essd-12-887-2020), 2020-04-20
Supplement: Supplementary file 1 [file essd-12-887-2020-supplement.zip › essd-12-887-2020-supplement-title-page.pdf]

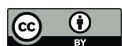

## *Supplement of*

# **An updated seabed bathymetry beneath Larsen C Ice Shelf, Antarctic Peninsula**

**Alex Brisbourne et al.**

*Correspondence to:* Alex Brisbourne (aleisb@bas.ac.uk)

- [essd-12-887-2020-supplement-title-page.pdf](#)
- [Supplement1-Bathymetry\\_WGS84\\_AntarcticPolarStereo.csv](#)

The copyright of individual parts of the supplement might differ from the CC BY 4.0 License.
