# Supplementary material for: An updated seabed bathymetry beneath Larsen C Ice Shelf, Antarctic Peninsula
Source: Copernicus journal article supplement (doi:10.5194/essd-12-887-2020), 2020-04-20
Supplement: Supplementary file 1 [file essd-12-887-2020-supplement.zip › Supplement1-Bathymetry_WGS84_AntarcticPolarStereo.csv]

Larsen C Ice Shelf bathymetry product
WGS 1984 Antarctic Polar Stereographic projection
Standard Parallel: -71.0
Central Meridian: 0.0
Linear Unit: Meter
X (m)	Y (m)	Elevation (m)
-2.015e+06	8.9713e+05	379.44
-2.0157e+06	8.9745e+05	516.07
-2.0164e+06	8.9776e+05	591.73
-2.0171e+06	8.9808e+05	638.72
-2.0178e+06	8.9839e+05	673.02
-2.0185e+06	8.9871e+05	692.05
-2.0192e+06	8.9902e+05	706.27
-2.0199e+06	8.9934e+05	726.64
-2.0207e+06	8.9965e+05	756.93
-2.0214e+06	8.9997e+05	793.44
-2.0221e+06	9.0028e+05	835.1
-2.0228e+06	9.006e+05	880.05
-2.0235e+06	9.0091e+05	926.66
-2.0242e+06	9.0123e+05	974.88
-2.0249e+06	9.0155e+05	1028.6
-2.0256e+06	9.0186e+05	1086
-2.0263e+06	9.0218e+05	1145.1
-2.027e+06	9.0249e+05	1199.3
-2.0277e+06	9.0281e+05	1228.1
-2.0285e+06	9.0313e+05	1233.7
-2.0292e+06	9.0344e+05	1218.5
-2.0299e+06	9.0376e+05	1200.8
-2.0306e+06	9.0408e+05	1210
-2.0313e+06	9.0439e+05	1241.1
-2.032e+06	9.0471e+05	1293.1
-2.0327e+06	9.0503e+05	1340.1
-2.0334e+06	9.0534e+05	1365.6
-2.0341e+06	9.0566e+05	1362.4
-2.0349e+06	9.0598e+05	1313.5
-2.0356e+06	9.063e+05	1249.7
-2.0363e+06	9.0661e+05	1183.8
-2.037e+06	9.0693e+05	1112.1
-2.0377e+06	9.0725e+05	1028.7
-2.0384e+06	9.0757e+05	932.06
-2.0391e+06	9.0789e+05	817.65
-2.0399e+06	9.082e+05	677.52
-2.0406e+06	9.0852e+05	514.52
-2.0413e+06	9.0884e+05	333.4
-2.042e+06	9.0916e+05	152.45
-2.0427e+06	9.0948e+05	62.833
-2.0434e+06	9.098e+05	20.74
-2.0442e+06	9.1012e+05	37.182
-2.0449e+06	9.1043e+05	87.424
-2.0456e+06	9.1075e+05	176.28
-2.0463e+06	9.1107e+05	288.16
-2.047e+06	9.1139e+05	419.14
-2.0477e+06	9.1171e+05	529.19
-2.0485e+06	9.1203e+05	594.69
-2.0492e+06	9.1235e+05	597.98
-2.0499e+06	9.1267e+05	551.41
-2.0506e+06	9.1299e+05	481.55
-2.0513e+06	9.1331e+05	365.66
-2.052e+06	9.1363e+05	220.14
-2.0528e+06	9.1395e+05	47.269
-2.0535e+06	9.1427e+05	-129.08
-2.0542e+06	9.1459e+05	-294.29
-2.0549e+06	9.1491e+05	-435.78
-2.0556e+06	9.1523e+05	-404.56
-2.0564e+06	9.1555e+05	-329.89
-2.0571e+06	9.1587e+05	-259.18
-2.0578e+06	9.1619e+05	-187.39
-2.0585e+06	9.1652e+05	-131.07
-2.0592e+06	9.1684e+05	-96.817
-2.06e+06	9.1716e+05	-63.537
-2.0607e+06	9.1748e+05	15.586
-2.0614e+06	9.178e+05	191.74
-2.0621e+06	9.1812e+05	441.69
-2.0629e+06	9.1844e+05	702.97
-2.0636e+06	9.1877e+05	871.44
-2.0643e+06	9.1909e+05	930.55
-2.065e+06	9.1941e+05	954.2
-2.0658e+06	9.1973e+05	1095
-2.0665e+06	9.2006e+05	1037
-2.0672e+06	9.2038e+05	917.48
-2.0679e+06	9.207e+05	830.81
-2.0687e+06	9.2102e+05	814.73
-2.0694e+06	9.2135e+05	852.96
-2.0701e+06	9.2167e+05	935.7
-2.0708e+06	9.2199e+05	1024.1
-2.0716e+06	9.2231e+05	1108.8
-2.0723e+06	9.2264e+05	1183.3
-2.073e+06	9.2296e+05	1250.7
-2.0737e+06	9.2328e+05	1298.3
-2.0745e+06	9.2361e+05	1329.6
-2.0752e+06	9.2393e+05	1351
-2.0759e+06	9.2426e+05	1351.4
-2.0766e+06	9.2458e+05	1330.1
-2.0774e+06	9.249e+05	1275.8
-2.0781e+06	9.2523e+05	1181.4
-2.0788e+06	9.2555e+05	1069.9
-2.0796e+06	9.2588e+05	977.63
-2.0803e+06	9.262e+05	901.59
-2.081e+06	9.2653e+05	849.49
-2.0817e+06	9.2685e+05	805.77
-2.0825e+06	9.2718e+05	753.83
-2.0832e+06	9.275e+05	689.6
-2.0839e+06	9.2783e+05	600.97
-2.0847e+06	9.2815e+05	511.15
-2.0854e+06	9.2848e+05	458.28
-2.0861e+06	9.288e+05	451.23
-2.0869e+06	9.2913e+05	482.78
-2.0876e+06	9.2945e+05	489.12
-2.0883e+06	9.2978e+05	550.09
-2.089e+06	9.301e+05	652.04
-2.0898e+06	9.3043e+05	758.88
-2.0905e+06	9.3076e+05	877.63
-2.0912e+06	9.3108e+05	1021
-2.092e+06	9.3141e+05	1198.1
-2.0927e+06	9.3173e+05	1407.6
-2.0934e+06	9.3206e+05	1548.1
-2.0942e+06	9.3239e+05	1614.5
-2.0949e+06	9.3271e+05	1672.7
-2.0956e+06	9.3304e+05	1704.4
-2.0964e+06	9.3337e+05	1702.3
-2.0971e+06	9.337e+05	1680.6
-2.0978e+06	9.3402e+05	1636.3
-2.0986e+06	9.3435e+05	1590.8
-2.0993e+06	9.3468e+05	1540.5
-2.1001e+06	9.3501e+05	1482.1
-2.1008e+06	9.3533e+05	1537.5
-2.1015e+06	9.3566e+05	1581.2
-2.1023e+06	9.3599e+05	1613
-2.103e+06	9.3632e+05	1633.8
-2.1037e+06	9.3664e+05	1620.2
-2.1045e+06	9.3697e+05	1581.2
-2.1052e+06	9.373e+05	1528
-2.106e+06	9.3763e+05	1492.9
-2.1067e+06	9.3796e+05	1451.5
-2.1074e+06	9.3829e+05	1412.7
-2.1082e+06	9.3862e+05	1390.1
-2.1089e+06	9.3894e+05	1369
-2.1096e+06	9.3927e+05	1398.8
-2.1104e+06	9.396e+05	1436
-2.1111e+06	9.3993e+05	1466.2
-2.1119e+06	9.4026e+05	1482.3
-2.1126e+06	9.4059e+05	1489.1
-2.1133e+06	9.4092e+05	1485.2
-2.1141e+06	9.4125e+05	1463.3
-2.1148e+06	9.4158e+05	1419.6
-2.1156e+06	9.4191e+05	1365.6
-2.1163e+06	9.4224e+05	1300.1
-2.117e+06	9.4257e+05	1241
-2.1178e+06	9.429e+05	1205.3
-2.1185e+06	9.4323e+05	1186.4
-2.1193e+06	9.4356e+05	1182.7
-2.12e+06	9.4389e+05	1188.5
-2.1208e+06	9.4422e+05	1202.7
-2.1215e+06	9.4455e+05	1225
-2.1222e+06	9.4489e+05	1257.7
-2.123e+06	9.4522e+05	1307.7
-2.1237e+06	9.4555e+05	1359.2
-2.1245e+06	9.4588e+05	1411.4
-2.1252e+06	9.4621e+05	1428.5
-2.126e+06	9.4654e+05	1360.2
-2.1267e+06	9.4687e+05	1215
-2.1275e+06	9.4721e+05	1177
-2.1282e+06	9.4754e+05	1224.9
-2.1289e+06	9.4787e+05	1309
-2.1297e+06	9.482e+05	1354.2
-2.1304e+06	9.4853e+05	1360.4
-2.1312e+06	9.4887e+05	1340.5
-2.1319e+06	9.492e+05	1302.9
-2.1327e+06	9.4953e+05	1251.8
-2.1334e+06	9.4986e+05	1192.7
-2.1342e+06	9.502e+05	1128.2
-2.1349e+06	9.5053e+05	1056.6
-2.1357e+06	9.5086e+05	990.69
-2.1364e+06	9.512e+05	936.44
-2.1372e+06	9.5153e+05	891.87
-2.1379e+06	9.5186e+05	851.27
-2.1387e+06	9.522e+05	815.17
-2.1394e+06	9.5253e+05	781.24
-2.1402e+06	9.5286e+05	743.84
-2.1409e+06	9.532e+05	707.67
-2.1417e+06	9.5353e+05	662.1
-2.1424e+06	9.5387e+05	597.57
-2.1432e+06	9.542e+05	515.51
-2.1439e+06	9.5454e+05	415.22
-2.1447e+06	9.5487e+05	292.62
-2.1454e+06	9.552e+05	151.78
-2.1462e+06	9.5554e+05	-0.7502
-2.1469e+06	9.5587e+05	-152.46
-2.1477e+06	9.5621e+05	-239.8
-2.1484e+06	9.5654e+05	-219.83
-2.1492e+06	9.5688e+05	-110.5
-2.1499e+06	9.5721e+05	73.726
-2.1507e+06	9.5755e+05	297.18
-2.1514e+06	9.5789e+05	523.96
-2.1522e+06	9.5822e+05	696.54
-2.153e+06	9.5856e+05	781.14
-2.1537e+06	9.5889e+05	782.32
-2.1545e+06	9.5923e+05	726.54
-2.1552e+06	9.5956e+05	640.84
-2.156e+06	9.599e+05	558.9
-2.1567e+06	9.6024e+05	505.7
-2.1575e+06	9.6057e+05	460.93
-2.1582e+06	9.6091e+05	415.63
-2.159e+06	9.6125e+05	361.72
-2.1598e+06	9.6158e+05	278.38
-2.1605e+06	9.6192e+05	163.21
-2.1613e+06	9.6226e+05	87.165
-2.162e+06	9.626e+05	114.16
-2.1628e+06	9.6293e+05	188.89
-2.1635e+06	9.6327e+05	296.9
-2.1643e+06	9.6361e+05	403.78
-2.1651e+06	9.6395e+05	496.81
-2.1658e+06	9.6428e+05	596.6
-2.1666e+06	9.6462e+05	697.77
-2.1673e+06	9.6496e+05	818.7
-2.1681e+06	9.653e+05	957.27
-2.1689e+06	9.6564e+05	1120.2
-2.1696e+06	9.6597e+05	1279.4
-2.1704e+06	9.6631e+05	1375.3
-2.1711e+06	9.6665e+05	1425.2
-2.1719e+06	9.6699e+05	1439.6
-2.1727e+06	9.6733e+05	1438
-2.1734e+06	9.6767e+05	1430.4
-2.1742e+06	9.6801e+05	1419.2
-2.1749e+06	9.6835e+05	1413.7
-2.1757e+06	9.6869e+05	1424.4
-2.1765e+06	9.6902e+05	1417.6
-2.1772e+06	9.6936e+05	1379
-2.178e+06	9.697e+05	1310.3
-2.1788e+06	9.7004e+05	1246.6
-2.1795e+06	9.7038e+05	1261.8
-2.1803e+06	9.7072e+05	1303.4
-2.181e+06	9.7106e+05	1332.5
-2.1818e+06	9.714e+05	1355.3
-2.1826e+06	9.7174e+05	1358.6
-2.1833e+06	9.7208e+05	1341.6
-2.1841e+06	9.7243e+05	1309.9
-2.1849e+06	9.7277e+05	1275.8
-2.1856e+06	9.7311e+05	1247.3
-2.1864e+06	9.7345e+05	1221.8
-2.1872e+06	9.7379e+05	1199.6
-2.1879e+06	9.7413e+05	1176.3
-2.1887e+06	9.7447e+05	1148.1
-2.1895e+06	9.7481e+05	1116.6
-2.1902e+06	9.7515e+05	1087.8
-2.191e+06	9.755e+05	1066.6
-2.1918e+06	9.7584e+05	1061.3
-2.1925e+06	9.7618e+05	1065.6
-2.1933e+06	9.7652e+05	1071.7
-2.1941e+06	9.7686e+05	1075.6
-2.1948e+06	9.7721e+05	1067
-2.1956e+06	9.7755e+05	1039.8
-2.1964e+06	9.7789e+05	999.23
-2.1972e+06	9.7823e+05	948.42
-2.1979e+06	9.7858e+05	901.58
-2.1987e+06	9.7892e+05	862.16
-2.1995e+06	9.7926e+05	820.7
-2.2002e+06	9.7961e+05	777.46
-2.201e+06	9.7995e+05	732.68
-2.2018e+06	9.8029e+05	685.14
-2.2025e+06	9.8064e+05	645.18
-2.2033e+06	9.8098e+05	627.94
-2.2041e+06	9.8132e+05	653.12
-2.2049e+06	9.8167e+05	695.25
-2.2056e+06	9.8201e+05	727.61
-2.2064e+06	9.8236e+05	753.62
-2.2072e+06	9.827e+05	775.96
-2.208e+06	9.8304e+05	795.1
-2.2087e+06	9.8339e+05	812.96
-2.2095e+06	9.8373e+05	831.44
-2.2103e+06	9.8408e+05	850.36
-2.2111e+06	9.8442e+05	871.06
-2.2118e+06	9.8477e+05	891.64
-2.2126e+06	9.8511e+05	916.08
-2.2134e+06	9.8546e+05	944.54
-2.2142e+06	9.858e+05	973.72
-2.2149e+06	9.8615e+05	1005.6
-2.2157e+06	9.8649e+05	1062.5
-2.2165e+06	9.8684e+05	1112
-2.2173e+06	9.8719e+05	1152.6
-2.218e+06	9.8753e+05	1182.9
-2.2188e+06	9.8788e+05	1153.3
-2.2196e+06	9.8822e+05	1107.2
-2.2204e+06	9.8857e+05	1088.8
-2.2211e+06	9.8892e+05	1091.1
-2.2219e+06	9.8926e+05	1077.3
-2.2227e+06	9.8961e+05	1021.5
-2.2235e+06	9.8996e+05	962.69
-2.2243e+06	9.903e+05	913.54
-2.225e+06	9.9065e+05	889.72
-2.2258e+06	9.91e+05	893.55
-2.2266e+06	9.9134e+05	912.72
-2.2274e+06	9.9169e+05	934.27
-2.2282e+06	9.9204e+05	951.42
-2.2289e+06	9.9239e+05	960.98
-2.2297e+06	9.9274e+05	963.66
-2.2305e+06	9.9308e+05	964.9
-2.2313e+06	9.9343e+05	967.99
-2.2321e+06	9.9378e+05	974.34
-2.2328e+06	9.9413e+05	982.79
-2.2336e+06	9.9448e+05	992.91
-2.2344e+06	9.9482e+05	1002.7
-2.2352e+06	9.9517e+05	1010.1
-2.236e+06	9.9552e+05	1010
-2.2368e+06	9.9587e+05	996.21
-2.2375e+06	9.9622e+05	970.25
-2.2383e+06	9.9657e+05	947.17
-2.2391e+06	9.9692e+05	942.12
-2.2399e+06	9.9727e+05	952.31
-2.2407e+06	9.9762e+05	983.86
-2.2415e+06	9.9797e+05	1026.8
-2.2423e+06	9.9832e+05	1067.3
-2.243e+06	9.9867e+05	1092.3
-2.2438e+06	9.9902e+05	1098.3
-2.2446e+06	9.9937e+05	1099.8
-2.2454e+06	9.9972e+05	1112.7
-2.2462e+06	1.0001e+06	1119
-2.247e+06	1.0004e+06	1112.2
-2.2478e+06	1.0008e+06	1117.7
-2.2485e+06	1.0011e+06	1156.2
-2.2493e+06	1.0015e+06	1185.5
-2.2501e+06	1.0018e+06	1203.9
-2.2509e+06	1.0022e+06	1186.1
-2.2517e+06	1.0025e+06	1139
-2.2525e+06	1.0029e+06	1090.5
-2.2533e+06	1.0032e+06	1043.6
-2.2541e+06	1.0036e+06	1007.2
-2.2549e+06	1.0039e+06	1004.8
-2.2556e+06	1.0043e+06	1023.7
-2.2564e+06	1.0046e+06	1051.2
-2.2572e+06	1.005e+06	1079.1
-2.258e+06	1.0053e+06	1103.3
-2.2588e+06	1.0057e+06	1123.1
-2.2596e+06	1.006e+06	1132
-2.2604e+06	1.0064e+06	1124.1
-2.2612e+06	1.0067e+06	1103.5
-2.262e+06	1.0071e+06	1089.7
-2.2628e+06	1.0074e+06	1100.9
-2.2636e+06	1.0078e+06	1125.3
-2.2644e+06	1.0082e+06	1141.7
-2.2651e+06	1.0085e+06	1137.6
-2.2659e+06	1.0089e+06	1116.2
-2.2667e+06	1.0092e+06	1113.7
-2.2675e+06	1.0096e+06	1129.1
-2.2683e+06	1.0099e+06	1150.2
-2.2691e+06	1.0103e+06	1141
-2.2699e+06	1.0106e+06	1090.7
-2.2707e+06	1.011e+06	1026.8
-2.2715e+06	1.0113e+06	972.09
-2.2723e+06	1.0117e+06	936.19
-2.2731e+06	1.012e+06	926.3
-2.2739e+06	1.0124e+06	927.06
-2.2747e+06	1.0128e+06	921.95
-2.2755e+06	1.0131e+06	915.29
-2.2763e+06	1.0135e+06	939.95
-2.2771e+06	1.0138e+06	982.29
-2.2779e+06	1.0142e+06	988.12
-2.2787e+06	1.0145e+06	966.57
-2.2795e+06	1.0149e+06	951.97
-2.2803e+06	1.0152e+06	983.15
-2.2811e+06	1.0156e+06	996.32
-2.2819e+06	1.016e+06	982.44
-2.2827e+06	1.0163e+06	961.38
-2.2835e+06	1.0167e+06	921.97
-2.2843e+06	1.017e+06	829.2
-2.2851e+06	1.0174e+06	729.49
-2.2859e+06	1.0177e+06	686.35
-2.2867e+06	1.0181e+06	741.89
-2.2875e+06	1.0185e+06	852.26
-2.2883e+06	1.0188e+06	990.23
-2.2891e+06	1.0192e+06	1115
-2.2899e+06	1.0195e+06	1187
-2.2907e+06	1.0199e+06	1236.3
-2.2915e+06	1.0202e+06	1270.2
-2.2923e+06	1.0206e+06	1304.3
-2.2931e+06	1.021e+06	1358.4
-2.2939e+06	1.0213e+06	1436.6
-2.2947e+06	1.0217e+06	1496.4
-2.2955e+06	1.022e+06	1544.2
-2.2963e+06	1.0224e+06	1553
-2.2971e+06	1.0227e+06	1521.5
-2.2979e+06	1.0231e+06	1455.1
-2.2987e+06	1.0235e+06	1426.5
-2.2995e+06	1.0238e+06	1440.3
-2.3003e+06	1.0242e+06	1470.4
-2.3011e+06	1.0245e+06	1475.1
-2.3019e+06	1.0249e+06	1415.3
-2.3028e+06	1.0253e+06	1397.7
-2.3036e+06	1.0256e+06	1383.7
-2.3044e+06	1.026e+06	1370.8
-2.3052e+06	1.0263e+06	1335.2
-2.306e+06	1.0267e+06	1248.9
-2.3068e+06	1.027e+06	1064.9
-2.3076e+06	1.0274e+06	1044.8
-2.3084e+06	1.0278e+06	1130.8
-2.3092e+06	1.0281e+06	1262.7
-2.31e+06	1.0285e+06	1368.6
-2.3108e+06	1.0288e+06	1389.1
-2.3116e+06	1.0292e+06	1367.7
-2.3125e+06	1.0296e+06	1313.4
-2.3133e+06	1.0299e+06	1199.6
-2.3141e+06	1.0303e+06	921.51
-2.3149e+06	1.0307e+06	674.56
-2.3157e+06	1.031e+06	640.69
-2.3165e+06	1.0314e+06	879.56
-2.3173e+06	1.0317e+06	1242
-2.3181e+06	1.0321e+06	1407
-2.3189e+06	1.0325e+06	1476.5
-2.3198e+06	1.0328e+06	1544.6
-2.3206e+06	1.0332e+06	1588.3
-2.3214e+06	1.0335e+06	1612.5
-2.3222e+06	1.0339e+06	1627
-2.323e+06	1.0343e+06	1611
-2.3238e+06	1.0346e+06	1596.5
-2.3246e+06	1.035e+06	1584.2
-2.3255e+06	1.0354e+06	1556.8
-2.3263e+06	1.0357e+06	1518.5
-2.3271e+06	1.0361e+06	1496.8
-2.3279e+06	1.0364e+06	1500.9
-2.3287e+06	1.0368e+06	1519.2
-2.3295e+06	1.0372e+06	1538.1
-2.3303e+06	1.0375e+06	1536.2
-2.3312e+06	1.0379e+06	1504.2
-2.332e+06	1.0383e+06	1430.2
-2.3328e+06	1.0386e+06	1343.2
-2.3336e+06	1.039e+06	1264.2
-2.3344e+06	1.0394e+06	1209.4
-2.3352e+06	1.0397e+06	1200
-2.3361e+06	1.0401e+06	1245.6
-2.3369e+06	1.0404e+06	1250.5
-2.3377e+06	1.0408e+06	1186
-2.3385e+06	1.0412e+06	1101.1
-2.3393e+06	1.0415e+06	1011.8
-2.3402e+06	1.0419e+06	931.19
-2.341e+06	1.0423e+06	848.95
-2.3418e+06	1.0426e+06	764.29
-2.3426e+06	1.043e+06	680.15
-2.3434e+06	1.0434e+06	600.48
-2.3443e+06	1.0437e+06	526.03
-2.3451e+06	1.0441e+06	460.91
-2.3459e+06	1.0445e+06	414.51
-2.3467e+06	1.0448e+06	382.69
-2.3475e+06	1.0452e+06	355.61
-2.3484e+06	1.0456e+06	321.61
-2.3492e+06	1.0459e+06	274.87
-2.35e+06	1.0463e+06	209.04
-2.3508e+06	1.0467e+06	77.104
-2.3517e+06	1.047e+06	-9.1644
-2.3525e+06	1.0474e+06	-12.779
-2.3533e+06	1.0478e+06	-14.908
-2.3541e+06	1.0481e+06	-17.881
-2.355e+06	1.0485e+06	-23.772
-2.3558e+06	1.0489e+06	-30.48
-2.3566e+06	1.0492e+06	-41.353
-2.3574e+06	1.0496e+06	-50.37
-2.3583e+06	1.05e+06	-59.352
-2.3591e+06	1.0503e+06	-62.483
-2.3599e+06	1.0507e+06	-66.506
-2.3607e+06	1.0511e+06	-66.535
-2.3616e+06	1.0514e+06	-61.765
-2.3624e+06	1.0518e+06	-55.64
-2.3632e+06	1.0522e+06	-46.842
-2.3641e+06	1.0525e+06	-43.365
-2.3649e+06	1.0529e+06	-36.937
-2.3657e+06	1.0533e+06	-33.532
-2.3665e+06	1.0537e+06	-28.132
-2.3674e+06	1.054e+06	-24.081
-2.3682e+06	1.0544e+06	-19.831
-2.369e+06	1.0548e+06	-17.419
-2.3699e+06	1.0551e+06	-15.161
-2.3707e+06	1.0555e+06	-13.131
-2.3715e+06	1.0559e+06	-11.548
-2.3723e+06	1.0562e+06	-10.151
-2.3732e+06	1.0566e+06	-10
-2.374e+06	1.057e+06	-10
-2.3748e+06	1.0573e+06	-10
-2.3757e+06	1.0577e+06	-10
-2.3765e+06	1.0581e+06	-11.992
-2.3773e+06	1.0585e+06	-14.17
-2.3782e+06	1.0588e+06	-17.656
-2.379e+06	1.0592e+06	-22.834
-2.3798e+06	1.0596e+06	-28.365
-2.3807e+06	1.0599e+06	-36.833
-2.3815e+06	1.0603e+06	-41.573
-2.3823e+06	1.0607e+06	-45.446
-2.3832e+06	1.0611e+06	-51.228
-2.384e+06	1.0614e+06	-54.28
-2.3848e+06	1.0618e+06	-60.074
-2.3857e+06	1.0622e+06	-72.003
-2.3865e+06	1.0625e+06	-83.476
-2.3874e+06	1.0629e+06	-95.498
-2.3882e+06	1.0633e+06	-111.12
-2.389e+06	1.0637e+06	-120.17
-2.3899e+06	1.064e+06	-136.26
-2.3907e+06	1.0644e+06	-150.06
-2.3915e+06	1.0648e+06	-157.26
-2.3924e+06	1.0652e+06	-163.87
-2.3932e+06	1.0655e+06	-172.24
-2.3941e+06	1.0659e+06	-174.91
-2.3949e+06	1.0663e+06	-181.91
-2.3957e+06	1.0666e+06	-188.48
-2.3966e+06	1.067e+06	-196.91
-2.3974e+06	1.0674e+06	-202.05
-2.3982e+06	1.0678e+06	-207.1
-2.3991e+06	1.0681e+06	-207.73
-2.3999e+06	1.0685e+06	-202.31
-2.4008e+06	1.0689e+06	-199.77
-2.4016e+06	1.0693e+06	-196.53
-2.4025e+06	1.0696e+06	-196.65
-2.4033e+06	1.07e+06	-200.6
-2.4041e+06	1.0704e+06	-209.53
-2.405e+06	1.0708e+06	-217.61
-2.4058e+06	1.0711e+06	-222.87
-2.4067e+06	1.0715e+06	-223.6
-2.4075e+06	1.0719e+06	-222.97
-2.4083e+06	1.0723e+06	-218.79
-2.4092e+06	1.0726e+06	-209.38
-2.41e+06	1.073e+06	-198.47
-2.4109e+06	1.0734e+06	-137.74
-2.4117e+06	1.0738e+06	-164.36
-2.4126e+06	1.0741e+06	-217.61
-2.4134e+06	1.0745e+06	-273.94
-2.4143e+06	1.0749e+06	-307.77
-2.4151e+06	1.0753e+06	-303.88
-2.416e+06	1.0757e+06	-249.11
-2.4168e+06	1.076e+06	-178.84
-2.4176e+06	1.0764e+06	-87.311
-2.4185e+06	1.0768e+06	-21.824
-2.4193e+06	1.0772e+06	-23.833
-2.4202e+06	1.0775e+06	-14.446
-2.421e+06	1.0779e+06	-10
-2.4219e+06	1.0783e+06	-10
-2.4227e+06	1.0787e+06	-10
-2.4236e+06	1.079e+06	-4.9502
-2.4244e+06	1.0794e+06	-4.1326
-2.4253e+06	1.0798e+06	-7.9048
-2.4261e+06	1.0802e+06	-10.713
-2.427e+06	1.0806e+06	-10.029
-2.4278e+06	1.0809e+06	-14.965
-2.4287e+06	1.0813e+06	-24.145
-2.4295e+06	1.0817e+06	-36.472
-2.4304e+06	1.0821e+06	-48.232
-2.4312e+06	1.0825e+06	-52.361
-2.4321e+06	1.0828e+06	-36.414
-2.4329e+06	1.0832e+06	-6.436
-2.4338e+06	1.0836e+06	28.264
-2.4346e+06	1.084e+06	66.626
-2.4355e+06	1.0844e+06	100.75
-2.4363e+06	1.0847e+06	126.68
-2.4372e+06	1.0851e+06	138.78
-2.4381e+06	1.0855e+06	126.51
-2.4389e+06	1.0859e+06	114.15
-2.4398e+06	1.0863e+06	91.687
-2.4406e+06	1.0866e+06	62.383
-2.4415e+06	1.087e+06	30.503
-2.4423e+06	1.0874e+06	0.13895
-2.4432e+06	1.0878e+06	-22.869
-2.444e+06	1.0882e+06	-35.432
-2.4449e+06	1.0885e+06	-34.555
-2.4458e+06	1.0889e+06	-39.824
-2.4466e+06	1.0893e+06	-61.653
-2.4475e+06	1.0897e+06	-81.619
-2.4483e+06	1.0901e+06	-95.707
-2.4492e+06	1.0904e+06	-112.83
-2.45e+06	1.0908e+06	-143.27
-2.4509e+06	1.0912e+06	-153.17
-2.4518e+06	1.0916e+06	-168.3
-2.4526e+06	1.092e+06	-182.87
-2.4535e+06	1.0924e+06	-194.12
-2.4543e+06	1.0927e+06	-194.77
-2.4552e+06	1.0931e+06	-182.09
-2.4561e+06	1.0935e+06	-166.45
-2.4569e+06	1.0939e+06	-153.68
-2.4578e+06	1.0943e+06	-138.72
-2.4586e+06	1.0947e+06	-124.45
-2.4595e+06	1.095e+06	-112.69
-2.4604e+06	1.0954e+06	-104.44
-2.4612e+06	1.0958e+06	-100.59
-2.4621e+06	1.0962e+06	-102.53
-2.4629e+06	1.0966e+06	-110.17
-2.4638e+06	1.097e+06	-122.15
-2.4647e+06	1.0973e+06	-137.06
-2.4655e+06	1.0977e+06	-153.95
-2.4664e+06	1.0981e+06	-172.48
-2.4673e+06	1.0985e+06	-191.08
-2.4681e+06	1.0989e+06	-210.49
-2.469e+06	1.0993e+06	-230.05
-2.4699e+06	1.0996e+06	-249.73
-2.4707e+06	1.1e+06	-269.53
-2.4716e+06	1.1004e+06	-288.95
-2.4725e+06	1.1008e+06	-305.67
-2.4733e+06	1.1012e+06	-318.35
-2.4742e+06	1.1016e+06	-325.97
-2.475e+06	1.102e+06	-326.45
-2.4759e+06	1.1023e+06	-330.36
-2.4768e+06	1.1027e+06	-350.27
-2.4777e+06	1.1031e+06	-360.23
-2.4785e+06	1.1035e+06	-362.33
-2.4794e+06	1.1039e+06	-371.72
-2.4803e+06	1.1043e+06	-383.53
-2.4811e+06	1.1047e+06	-386.39
-2.482e+06	1.1051e+06	-387.15
-2.4829e+06	1.1054e+06	-401.52
-2.4837e+06	1.1058e+06	-418.22
-2.0147e+06	8.9783e+05	493.9
-2.0154e+06	8.9815e+05	564.72
-2.0161e+06	8.9846e+05	613.76
-2.0168e+06	8.9877e+05	651.98
-2.0175e+06	8.9909e+05	673.98
-2.0182e+06	8.994e+05	684.79
-2.0189e+06	8.9972e+05	689.05
-2.0196e+06	9.0004e+05	709.58
-2.0203e+06	9.0035e+05	742.65
-2.021e+06	9.0067e+05	782.09
-2.0218e+06	9.0098e+05	825.21
-2.0225e+06	9.013e+05	871.06
-2.0232e+06	9.0161e+05	916.44
-2.0239e+06	9.0193e+05	963.1
-2.0246e+06	9.0225e+05	1021.1
-2.0253e+06	9.0256e+05	1087.8
-2.026e+06	9.0288e+05	1160.3
-2.0267e+06	9.0319e+05	1220.9
-2.0274e+06	9.0351e+05	1257.2
-2.0281e+06	9.0383e+05	1262.8
-2.0289e+06	9.0414e+05	1226.2
-2.0296e+06	9.0446e+05	1189.6
-2.0303e+06	9.0478e+05	1178.3
-2.031e+06	9.051e+05	1222.6
-2.0317e+06	9.0541e+05	1293.9
-2.0324e+06	9.0573e+05	1363.3
-2.0331e+06	9.0605e+05	1414.1
-2.0338e+06	9.0637e+05	1391.5
-2.0345e+06	9.0668e+05	1333.7
-2.0353e+06	9.07e+05	1268.9
-2.036e+06	9.0732e+05	1198.7
-2.0367e+06	9.0764e+05	1124.1
-2.0374e+06	9.0795e+05	1043.5
-2.0381e+06	9.0827e+05	953.62
-2.0388e+06	9.0859e+05	847.48
-2.0395e+06	9.0891e+05	713.66
-2.0403e+06	9.0923e+05	559.08
-2.041e+06	9.0955e+05	383.57
-2.0417e+06	9.0987e+05	201.19
-2.0424e+06	9.1018e+05	138.9
-2.0431e+06	9.105e+05	187.18
-2.0438e+06	9.1082e+05	258.25
-2.0446e+06	9.1114e+05	329.88
-2.0453e+06	9.1146e+05	420.14
-2.046e+06	9.1178e+05	529.62
-2.0467e+06	9.121e+05	658.19
-2.0474e+06	9.1242e+05	756.46
-2.0481e+06	9.1274e+05	812.77
-2.0489e+06	9.1306e+05	767.29
-2.0496e+06	9.1338e+05	643.38
-2.0503e+06	9.137e+05	484.42
-2.051e+06	9.1402e+05	296.73
-2.0517e+06	9.1434e+05	123.45
-2.0524e+06	9.1466e+05	-57.49
-2.0532e+06	9.1498e+05	-234.09
-2.0539e+06	9.153e+05	-329.13
-2.0546e+06	9.1562e+05	-368.25
-2.0553e+06	9.1594e+05	-344.31
-2.056e+06	9.1626e+05	-279.07
-2.0568e+06	9.1659e+05	-216.5
-2.0575e+06	9.1691e+05	-151.58
-2.0582e+06	9.1723e+05	-85.649
-2.0589e+06	9.1755e+05	-16.709
-2.0597e+06	9.1787e+05	54.826
-2.0604e+06	9.1819e+05	170.84
-2.0611e+06	9.1851e+05	347.34
-2.0618e+06	9.1884e+05	596.54
-2.0625e+06	9.1916e+05	830.33
-2.0633e+06	9.1948e+05	952.29
-2.064e+06	9.198e+05	905.02
-2.0647e+06	9.2013e+05	1018.7
-2.0654e+06	9.2045e+05	1107.1
-2.0662e+06	9.2077e+05	1068.7
-2.0669e+06	9.2109e+05	906.65
-2.0676e+06	9.2142e+05	795.71
-2.0683e+06	9.2174e+05	779.92
-2.0691e+06	9.2206e+05	852.49
-2.0698e+06	9.2239e+05	973.02
-2.0705e+06	9.2271e+05	1072.8
-2.0712e+06	9.2303e+05	1144.6
-2.072e+06	9.2336e+05	1195.9
-2.0727e+06	9.2368e+05	1249.4
-2.0734e+06	9.24e+05	1295.1
-2.0741e+06	9.2433e+05	1328.3
-2.0749e+06	9.2465e+05	1349.1
-2.0756e+06	9.2497e+05	1355.5
-2.0763e+06	9.253e+05	1352.6
-2.077e+06	9.2562e+05	1354.5
-2.0778e+06	9.2595e+05	1273.7
-2.0785e+06	9.2627e+05	1171
-2.0792e+06	9.266e+05	1071.8
-2.08e+06	9.2692e+05	995.11
-2.0807e+06	9.2725e+05	954.76
-2.0814e+06	9.2757e+05	928.36
-2.0821e+06	9.279e+05	897.17
-2.0829e+06	9.2822e+05	844.77
-2.0836e+06	9.2855e+05	762.39
-2.0843e+06	9.2887e+05	666.92
-2.0851e+06	9.292e+05	566.98
-2.0858e+06	9.2952e+05	537.37
-2.0865e+06	9.2985e+05	532.78
-2.0873e+06	9.3017e+05	542.12
-2.088e+06	9.305e+05	603.39
-2.0887e+06	9.3083e+05	689.83
-2.0895e+06	9.3115e+05	767.08
-2.0902e+06	9.3148e+05	835.93
-2.0909e+06	9.3181e+05	971.02
-2.0917e+06	9.3213e+05	1155.7
-2.0924e+06	9.3246e+05	1352.8
-2.0931e+06	9.3279e+05	1507
-2.0939e+06	9.3311e+05	1594.4
-2.0946e+06	9.3344e+05	1648.8
-2.0953e+06	9.3377e+05	1668.7
-2.0961e+06	9.3409e+05	1660.9
-2.0968e+06	9.3442e+05	1656.9
-2.0975e+06	9.3475e+05	1639.1
-2.0983e+06	9.3508e+05	1613.4
-2.099e+06	9.354e+05	1607.3
-2.0997e+06	9.3573e+05	1585.5
-2.1005e+06	9.3606e+05	1576.2
-2.1012e+06	9.3639e+05	1556.8
-2.1019e+06	9.3672e+05	1581.8
-2.1027e+06	9.3704e+05	1615.4
-2.1034e+06	9.3737e+05	1626
-2.1042e+06	9.377e+05	1596.2
-2.1049e+06	9.3803e+05	1522.5
-2.1056e+06	9.3836e+05	1472.5
-2.1064e+06	9.3869e+05	1442.2
-2.1071e+06	9.3902e+05	1458.8
-2.1078e+06	9.3935e+05	1462.4
-2.1086e+06	9.3967e+05	1458.6
-2.1093e+06	9.4e+05	1472.2
-2.1101e+06	9.4033e+05	1500.7
-2.1108e+06	9.4066e+05	1524.6
-2.1115e+06	9.4099e+05	1534.4
-2.1123e+06	9.4132e+05	1529.7
-2.113e+06	9.4165e+05	1518.1
-2.1138e+06	9.4198e+05	1488.6
-2.1145e+06	9.4231e+05	1427.8
-2.1152e+06	9.4264e+05	1348.8
-2.116e+06	9.4297e+05	1263.7
-2.1167e+06	9.433e+05	1194.3
-2.1175e+06	9.4363e+05	1153.6
-2.1182e+06	9.4396e+05	1143.1
-2.1189e+06	9.443e+05	1165
-2.1197e+06	9.4463e+05	1196.2
-2.1204e+06	9.4496e+05	1231.7
-2.1212e+06	9.4529e+05	1277
-2.1219e+06	9.4562e+05	1325.5
-2.1227e+06	9.4595e+05	1387.5
-2.1234e+06	9.4628e+05	1441.6
-2.1242e+06	9.4661e+05	1466.4
-2.1249e+06	9.4695e+05	1448
-2.1256e+06	9.4728e+05	1346.7
-2.1264e+06	9.4761e+05	1217.3
-2.1271e+06	9.4794e+05	1113
-2.1279e+06	9.4827e+05	1183.2
-2.1286e+06	9.4861e+05	1265.4
-2.1294e+06	9.4894e+05	1319.1
-2.1301e+06	9.4927e+05	1337.4
-2.1309e+06	9.496e+05	1318.4
-2.1316e+06	9.4994e+05	1286.2
-2.1324e+06	9.5027e+05	1248.1
-2.1331e+06	9.506e+05	1203.3
-2.1338e+06	9.5094e+05	1149.2
-2.1346e+06	9.5127e+05	1091.2
-2.1353e+06	9.516e+05	1032.5
-2.1361e+06	9.5194e+05	977.82
-2.1368e+06	9.5227e+05	936.51
-2.1376e+06	9.526e+05	898.82
-2.1383e+06	9.5294e+05	858.81
-2.1391e+06	9.5327e+05	816.97
-2.1398e+06	9.536e+05	775.2
-2.1406e+06	9.5394e+05	729.98
-2.1413e+06	9.5427e+05	673.3
-2.1421e+06	9.5461e+05	595.68
-2.1428e+06	9.5494e+05	496.16
-2.1436e+06	9.5528e+05	379.51
-2.1443e+06	9.5561e+05	246.5
-2.1451e+06	9.5595e+05	95.058
-2.1458e+06	9.5628e+05	-60.855
-2.1466e+06	9.5662e+05	-192.37
-2.1473e+06	9.5695e+05	-261.48
-2.1481e+06	9.5729e+05	-229.03
-2.1489e+06	9.5762e+05	-106.81
-2.1496e+06	9.5796e+05	76.516
-2.1504e+06	9.5829e+05	287.75
-2.1511e+06	9.5863e+05	506.04
-2.1519e+06	9.5897e+05	691.81
-2.1526e+06	9.593e+05	759.48
-2.1534e+06	9.5964e+05	759.39
-2.1541e+06	9.5997e+05	703.87
-2.1549e+06	9.6031e+05	585.4
-2.1556e+06	9.6065e+05	468.92
-2.1564e+06	9.6098e+05	373.6
-2.1572e+06	9.6132e+05	304.6
-2.1579e+06	9.6166e+05	265.32
-2.1587e+06	9.6199e+05	219.14
-2.1594e+06	9.6233e+05	172.95
-2.1602e+06	9.6267e+05	98.627
-2.1609e+06	9.6301e+05	-14.051
-2.1617e+06	9.6334e+05	143.55
-2.1624e+06	9.6368e+05	326.21
-2.1632e+06	9.6402e+05	495.67
-2.164e+06	9.6436e+05	670.62
-2.1647e+06	9.6469e+05	717.22
-2.1655e+06	9.6503e+05	741.02
-2.1662e+06	9.6537e+05	795.38
-2.167e+06	9.6571e+05	880.17
-2.1678e+06	9.6605e+05	1010.6
-2.1685e+06	9.6639e+05	1148.8
-2.1693e+06	9.6672e+05	1283.7
-2.17e+06	9.6706e+05	1397.6
-2.1708e+06	9.674e+05	1461.3
-2.1716e+06	9.6774e+05	1490.1
-2.1723e+06	9.6808e+05	1493.4
-2.1731e+06	9.6842e+05	1475.9
-2.1738e+06	9.6876e+05	1447.6
-2.1746e+06	9.691e+05	1439.1
-2.1754e+06	9.6944e+05	1450.9
-2.1761e+06	9.6978e+05	1462.7
-2.1769e+06	9.7012e+05	1402.3
-2.1777e+06	9.7046e+05	1320.1
-2.1784e+06	9.708e+05	1270
-2.1792e+06	9.7114e+05	1276.4
-2.1799e+06	9.7148e+05	1307.9
-2.1807e+06	9.7182e+05	1338.1
-2.1815e+06	9.7216e+05	1359.4
-2.1822e+06	9.725e+05	1359.8
-2.183e+06	9.7284e+05	1334.2
-2.1838e+06	9.7318e+05	1292.9
-2.1845e+06	9.7352e+05	1249.8
-2.1853e+06	9.7386e+05	1210.4
-2.1861e+06	9.742e+05	1179.2
-2.1868e+06	9.7455e+05	1155.1
-2.1876e+06	9.7489e+05	1131.1
-2.1884e+06	9.7523e+05	1107.1
-2.1891e+06	9.7557e+05	1085.9
-2.1899e+06	9.7591e+05	1064
-2.1907e+06	9.7625e+05	1048
-2.1914e+06	9.766e+05	1043.1
-2.1922e+06	9.7694e+05	1050.4
-2.193e+06	9.7728e+05	1060.6
-2.1937e+06	9.7762e+05	1063.9
-2.1945e+06	9.7797e+05	1059
-2.1953e+06	9.7831e+05	1034.4
-2.196e+06	9.7865e+05	983.79
-2.1968e+06	9.7899e+05	923.25
-2.1976e+06	9.7934e+05	862
-2.1984e+06	9.7968e+05	807.21
-2.1991e+06	9.8002e+05	758.06
-2.1999e+06	9.8037e+05	711.22
-2.2007e+06	9.8071e+05	669.82
-2.2014e+06	9.8105e+05	629.57
-2.2022e+06	9.814e+05	600.49
-2.203e+06	9.8174e+05	590.19
-2.2038e+06	9.8209e+05	622.01
-2.2045e+06	9.8243e+05	674.47
-2.2053e+06	9.8277e+05	721.99
-2.2061e+06	9.8312e+05	743.48
-2.2068e+06	9.8346e+05	765.15
-2.2076e+06	9.8381e+05	787.85
-2.2084e+06	9.8415e+05	811.29
-2.2092e+06	9.845e+05	835.67
-2.2099e+06	9.8484e+05	857.7
-2.2107e+06	9.8519e+05	882.63
-2.2115e+06	9.8553e+05	909.39
-2.2123e+06	9.8588e+05	931.27
-2.213e+06	9.8622e+05	955.2
-2.2138e+06	9.8657e+05	986.32
-2.2146e+06	9.8692e+05	1023.3
-2.2154e+06	9.8726e+05	1072.2
-2.2161e+06	9.8761e+05	1121.3
-2.2169e+06	9.8795e+05	1163.2
-2.2177e+06	9.883e+05	1183
-2.2185e+06	9.8865e+05	1163.4
-2.2192e+06	9.8899e+05	1127.1
-2.22e+06	9.8934e+05	1104.2
-2.2208e+06	9.8969e+05	1102.5
-2.2216e+06	9.9003e+05	1080.9
-2.2224e+06	9.9038e+05	1027.2
-2.2231e+06	9.9073e+05	951.25
-2.2239e+06	9.9107e+05	885.44
-2.2247e+06	9.9142e+05	862.53
-2.2255e+06	9.9177e+05	872.07
-2.2263e+06	9.9212e+05	902.86
-2.227e+06	9.9246e+05	936.61
-2.2278e+06	9.9281e+05	954.56
-2.2286e+06	9.9316e+05	960.71
-2.2294e+06	9.9351e+05	958.77
-2.2302e+06	9.9385e+05	956.63
-2.2309e+06	9.942e+05	961.91
-2.2317e+06	9.9455e+05	970.61
-2.2325e+06	9.949e+05	980.35
-2.2333e+06	9.9525e+05	990.55
-2.2341e+06	9.956e+05	1004
-2.2348e+06	9.9595e+05	1017.1
-2.2356e+06	9.9629e+05	1015.9
-2.2364e+06	9.9664e+05	998.3
-2.2372e+06	9.9699e+05	968.61
-2.238e+06	9.9734e+05	936.28
-2.2388e+06	9.9769e+05	921.61
-2.2396e+06	9.9804e+05	940.04
-2.2403e+06	9.9839e+05	987.13
-2.2411e+06	9.9874e+05	1032.5
-2.2419e+06	9.9909e+05	1069.3
-2.2427e+06	9.9944e+05	1089.4
-2.2435e+06	9.9979e+05	1098.8
-2.2443e+06	1.0001e+06	1107.9
-2.2451e+06	1.0005e+06	1123.6
-2.2458e+06	1.0008e+06	1146.2
-2.2466e+06	1.0012e+06	1159.9
-2.2474e+06	1.0015e+06	1175.7
-2.2482e+06	1.0019e+06	1192.6
-2.249e+06	1.0022e+06	1205.6
-2.2498e+06	1.0026e+06	1205
-2.2506e+06	1.0029e+06	1179.1
-2.2514e+06	1.0033e+06	1134.3
-2.2521e+06	1.0037e+06	1078.3
-2.2529e+06	1.004e+06	1024.2
-2.2537e+06	1.0044e+06	985.08
-2.2545e+06	1.0047e+06	980.22
-2.2553e+06	1.0051e+06	1008.4
-2.2561e+06	1.0054e+06	1048.7
-2.2569e+06	1.0058e+06	1080.5
-2.2577e+06	1.0061e+06	1103.6
-2.2585e+06	1.0065e+06	1119.2
-2.2593e+06	1.0068e+06	1119.4
-2.26e+06	1.0072e+06	1096.9
-2.2608e+06	1.0075e+06	1060.1
-2.2616e+06	1.0079e+06	1031.5
-2.2624e+06	1.0082e+06	1030.7
-2.2632e+06	1.0086e+06	1049.4
-2.264e+06	1.0089e+06	1067.3
-2.2648e+06	1.0093e+06	1078.6
-2.2656e+06	1.0096e+06	1074.5
-2.2664e+06	1.01e+06	1084.6
-2.2672e+06	1.0104e+06	1106.5
-2.268e+06	1.0107e+06	1118.2
-2.2688e+06	1.0111e+06	1102.2
-2.2696e+06	1.0114e+06	1079.6
-2.2704e+06	1.0118e+06	1038.2
-2.2712e+06	1.0121e+06	986.69
-2.272e+06	1.0125e+06	947.78
-2.2727e+06	1.0128e+06	934.17
-2.2735e+06	1.0132e+06	932.82
-2.2743e+06	1.0135e+06	936.18
-2.2751e+06	1.0139e+06	951.35
-2.2759e+06	1.0143e+06	987.19
-2.2767e+06	1.0146e+06	1029.5
-2.2775e+06	1.015e+06	1031.3
-2.2783e+06	1.0153e+06	1003.2
-2.2791e+06	1.0157e+06	986.07
-2.2799e+06	1.016e+06	1005
-2.2807e+06	1.0164e+06	1010.2
-2.2815e+06	1.0167e+06	1004.2
-2.2823e+06	1.0171e+06	994.19
-2.2831e+06	1.0175e+06	978.07
-2.2839e+06	1.0178e+06	925.08
-2.2847e+06	1.0182e+06	871.91
-2.2855e+06	1.0185e+06	861.64
-2.2863e+06	1.0189e+06	898.71
-2.2871e+06	1.0192e+06	953.73
-2.2879e+06	1.0196e+06	1022.8
-2.2887e+06	1.02e+06	1130.5
-2.2895e+06	1.0203e+06	1207.8
-2.2903e+06	1.0207e+06	1264.3
-2.2911e+06	1.021e+06	1299.5
-2.2919e+06	1.0214e+06	1321.6
-2.2927e+06	1.0217e+06	1373.1
-2.2935e+06	1.0221e+06	1429
-2.2943e+06	1.0225e+06	1476.7
-2.2952e+06	1.0228e+06	1523.9
-2.296e+06	1.0232e+06	1551.3
-2.2968e+06	1.0235e+06	1520
-2.2976e+06	1.0239e+06	1466
-2.2984e+06	1.0243e+06	1460.1
-2.2992e+06	1.0246e+06	1510.3
-2.3e+06	1.025e+06	1558.6
-2.3008e+06	1.0253e+06	1533
-2.3016e+06	1.0257e+06	1460.2
-2.3024e+06	1.026e+06	1387.1
-2.3032e+06	1.0264e+06	1318.8
-2.304e+06	1.0268e+06	1257
-2.3048e+06	1.0271e+06	1223
-2.3056e+06	1.0275e+06	1176
-2.3064e+06	1.0278e+06	1116.6
-2.3072e+06	1.0282e+06	1108.3
-2.3081e+06	1.0286e+06	1190.6
-2.3089e+06	1.0289e+06	1312.5
-2.3097e+06	1.0293e+06	1405.2
-2.3105e+06	1.0296e+06	1447.3
-2.3113e+06	1.03e+06	1453.6
-2.3121e+06	1.0304e+06	1419.4
-2.3129e+06	1.0307e+06	1314.2
-2.3137e+06	1.0311e+06	1062.5
-2.3145e+06	1.0315e+06	816.93
-2.3153e+06	1.0318e+06	713.93
-2.3161e+06	1.0322e+06	882.33
-2.317e+06	1.0325e+06	1234.8
-2.3178e+06	1.0329e+06	1408.5
-2.3186e+06	1.0333e+06	1493.4
-2.3194e+06	1.0336e+06	1539
-2.3202e+06	1.034e+06	1561.3
-2.321e+06	1.0343e+06	1612.1
-2.3218e+06	1.0347e+06	1623.4
-2.3226e+06	1.0351e+06	1609.9
-2.3235e+06	1.0354e+06	1627.6
-2.3243e+06	1.0358e+06	1650.6
-2.3251e+06	1.0362e+06	1626.9
-2.3259e+06	1.0365e+06	1600.6
-2.3267e+06	1.0369e+06	1593.9
-2.3275e+06	1.0373e+06	1600.8
-2.3284e+06	1.0376e+06	1618
-2.3292e+06	1.038e+06	1625.9
-2.33e+06	1.0383e+06	1601.2
-2.3308e+06	1.0387e+06	1542.6
-2.3316e+06	1.0391e+06	1458
-2.3324e+06	1.0394e+06	1365
-2.3333e+06	1.0398e+06	1285.6
-2.3341e+06	1.0402e+06	1227.7
-2.3349e+06	1.0405e+06	1200.7
-2.3357e+06	1.0409e+06	1207.8
-2.3365e+06	1.0413e+06	1175.7
-2.3373e+06	1.0416e+06	1102.1
-2.3382e+06	1.042e+06	1008.3
-2.339e+06	1.0424e+06	908.67
-2.3398e+06	1.0427e+06	814.77
-2.3406e+06	1.0431e+06	728.04
-2.3414e+06	1.0434e+06	646.76
-2.3423e+06	1.0438e+06	567.82
-2.3431e+06	1.0442e+06	495.21
-2.3439e+06	1.0445e+06	430.4
-2.3447e+06	1.0449e+06	372.74
-2.3455e+06	1.0453e+06	333.05
-2.3464e+06	1.0456e+06	308.82
-2.3472e+06	1.046e+06	275.46
-2.348e+06	1.0464e+06	259.59
-2.3488e+06	1.0467e+06	236.51
-2.3497e+06	1.0471e+06	166.61
-2.3505e+06	1.0475e+06	42.169
-2.3513e+06	1.0478e+06	-12.143
-2.3521e+06	1.0482e+06	-13.667
-2.3529e+06	1.0486e+06	-16.067
-2.3538e+06	1.0489e+06	-19.243
-2.3546e+06	1.0493e+06	-26.464
-2.3554e+06	1.0497e+06	-34.019
-2.3562e+06	1.05e+06	-44.156
-2.3571e+06	1.0504e+06	-49.409
-2.3579e+06	1.0508e+06	-59.329
-2.3587e+06	1.0512e+06	-62.053
-2.3596e+06	1.0515e+06	-65.169
-2.3604e+06	1.0519e+06	-64.125
-2.3612e+06	1.0523e+06	-59.487
-2.362e+06	1.0526e+06	-57.002
-2.3629e+06	1.053e+06	-46.693
-2.3637e+06	1.0534e+06	-41.409
-2.3645e+06	1.0537e+06	-35.805
-2.3653e+06	1.0541e+06	-31.53
-2.3662e+06	1.0545e+06	-26.123
-2.367e+06	1.0548e+06	-22.646
-2.3678e+06	1.0552e+06	-19.056
-2.3687e+06	1.0556e+06	-16.905
-2.3695e+06	1.0559e+06	-15.055
-2.3703e+06	1.0563e+06	-13.143
-2.3712e+06	1.0567e+06	-11.745
-2.372e+06	1.0571e+06	-10.041
-2.3728e+06	1.0574e+06	-10
-2.3736e+06	1.0578e+06	-10
-2.3745e+06	1.0582e+06	-10
-2.3753e+06	1.0585e+06	-10
-2.3761e+06	1.0589e+06	-11.278
-2.377e+06	1.0593e+06	-13.266
-2.3778e+06	1.0597e+06	-17.396
-2.3786e+06	1.06e+06	-23.372
-2.3795e+06	1.0604e+06	-27.907
-2.3803e+06	1.0608e+06	-32.115
-2.3811e+06	1.0611e+06	-38.215
-2.382e+06	1.0615e+06	-41.92
-2.3828e+06	1.0619e+06	-45.137
-2.3836e+06	1.0623e+06	-48.671
-2.3845e+06	1.0626e+06	-51.523
-2.3853e+06	1.063e+06	-59.179
-2.3861e+06	1.0634e+06	-74.364
-2.387e+06	1.0637e+06	-84.814
-2.3878e+06	1.0641e+06	-103.01
-2.3887e+06	1.0645e+06	-117.45
-2.3895e+06	1.0649e+06	-131.91
-2.3903e+06	1.0652e+06	-143.38
-2.3912e+06	1.0656e+06	-155.15
-2.392e+06	1.066e+06	-159.09
-2.3928e+06	1.0664e+06	-171.82
-2.3937e+06	1.0667e+06	-180.93
-2.3945e+06	1.0671e+06	-186.88
-2.3954e+06	1.0675e+06	-190.8
-2.3962e+06	1.0678e+06	-196.82
-2.397e+06	1.0682e+06	-195.65
-2.3979e+06	1.0686e+06	-197.28
-2.3987e+06	1.069e+06	-194.31
-2.3996e+06	1.0693e+06	-188.5
-2.4004e+06	1.0697e+06	-182.89
-2.4012e+06	1.0701e+06	-176.84
-2.4021e+06	1.0705e+06	-175.51
-2.4029e+06	1.0708e+06	-176.47
-2.4038e+06	1.0712e+06	-182.86
-2.4046e+06	1.0716e+06	-187.31
-2.4054e+06	1.072e+06	-189.93
-2.4063e+06	1.0723e+06	-189.7
-2.4071e+06	1.0727e+06	-186.62
-2.408e+06	1.0731e+06	-179.29
-2.4088e+06	1.0735e+06	-163.96
-2.4097e+06	1.0739e+06	-147.14
-2.4105e+06	1.0742e+06	-63.211
-2.4114e+06	1.0746e+06	-24.834
-2.4122e+06	1.075e+06	-55.579
-2.413e+06	1.0754e+06	-237.53
-2.4139e+06	1.0757e+06	-295.65
-2.4147e+06	1.0761e+06	-295.41
-2.4156e+06	1.0765e+06	-250.97
-2.4164e+06	1.0769e+06	-183.87
-2.4173e+06	1.0772e+06	-99.035
-2.4181e+06	1.0776e+06	-36.604
-2.419e+06	1.078e+06	-31.104
-2.4198e+06	1.0784e+06	-17.72
-2.4207e+06	1.0788e+06	-10.865
-2.4215e+06	1.0791e+06	-10
-2.4224e+06	1.0795e+06	-10
-2.4232e+06	1.0799e+06	-8.1394
-2.4241e+06	1.0803e+06	-1.3076
-2.4249e+06	1.0806e+06	5.1189
-2.4258e+06	1.081e+06	2.1203
-2.4266e+06	1.0814e+06	-9.3152
-2.4275e+06	1.0818e+06	-12.976
-2.4283e+06	1.0822e+06	-19.398
-2.4292e+06	1.0825e+06	-28.72
-2.43e+06	1.0829e+06	-45.588
-2.4309e+06	1.0833e+06	-60.477
-2.4317e+06	1.0837e+06	-41.6
-2.4326e+06	1.0841e+06	-17.414
-2.4334e+06	1.0844e+06	12.555
-2.4343e+06	1.0848e+06	46.573
-2.4351e+06	1.0852e+06	80.728
-2.436e+06	1.0856e+06	108.59
-2.4368e+06	1.086e+06	127.12
-2.4377e+06	1.0863e+06	131.35
-2.4385e+06	1.0867e+06	135.88
-2.4394e+06	1.0871e+06	131.35
-2.4402e+06	1.0875e+06	109.81
-2.4411e+06	1.0879e+06	86.75
-2.442e+06	1.0882e+06	66.318
-2.4428e+06	1.0886e+06	46.349
-2.4437e+06	1.089e+06	36.989
-2.4445e+06	1.0894e+06	28.342
-2.4454e+06	1.0898e+06	23.465
-2.4462e+06	1.0901e+06	14.255
-2.4471e+06	1.0905e+06	-8.1186
-2.4479e+06	1.0909e+06	-10.623
-2.4488e+06	1.0913e+06	-22.633
-2.4497e+06	1.0917e+06	-50.09
-2.4505e+06	1.0921e+06	-83.508
-2.4514e+06	1.0924e+06	-134.84
-2.4522e+06	1.0928e+06	-194.41
-2.4531e+06	1.0932e+06	-222.03
-2.454e+06	1.0936e+06	-226.53
-2.4548e+06	1.094e+06	-210.97
-2.4557e+06	1.0944e+06	-191.16
-2.4565e+06	1.0947e+06	-172.47
-2.4574e+06	1.0951e+06	-154.48
-2.4583e+06	1.0955e+06	-134.88
-2.4591e+06	1.0959e+06	-114.36
-2.46e+06	1.0963e+06	-106.15
-2.4608e+06	1.0967e+06	-99.769
-2.4617e+06	1.097e+06	-99.89
-2.4626e+06	1.0974e+06	-106.08
-2.4634e+06	1.0978e+06	-117.66
-2.4643e+06	1.0982e+06	-132.17
-2.4652e+06	1.0986e+06	-148.22
-2.466e+06	1.099e+06	-166.25
-2.4669e+06	1.0993e+06	-183.91
-2.4677e+06	1.0997e+06	-203.1
-2.4686e+06	1.1001e+06	-222.32
-2.4695e+06	1.1005e+06	-241.41
-2.4703e+06	1.1009e+06	-260.77
-2.4712e+06	1.1013e+06	-280
-2.4721e+06	1.1017e+06	-297.34
-2.4729e+06	1.102e+06	-309.85
-2.4738e+06	1.1024e+06	-316.21
-2.4747e+06	1.1028e+06	-313.87
-2.4755e+06	1.1032e+06	-321.02
-2.4764e+06	1.1036e+06	-341.24
-2.4773e+06	1.104e+06	-352.77
-2.4781e+06	1.1044e+06	-354.36
-2.479e+06	1.1048e+06	-361.77
-2.4799e+06	1.1051e+06	-378.48
-2.4807e+06	1.1055e+06	-383.15
-2.4816e+06	1.1059e+06	-385.75
-2.4825e+06	1.1063e+06	-399.51
-2.4833e+06	1.1067e+06	-414.09
-2.0144e+06	8.9853e+05	612.32
-2.0151e+06	8.9884e+05	636.93
-2.0158e+06	8.9916e+05	663.71
-2.0165e+06	8.9947e+05	681.84
-2.0172e+06	8.9979e+05	689.58
-2.0179e+06	9.001e+05	688.36
-2.0186e+06	9.0042e+05	686.5
-2.0193e+06	9.0073e+05	697.57
-2.02e+06	9.0105e+05	732.06
-2.0207e+06	9.0137e+05	777.81
-2.0214e+06	9.0168e+05	822.22
-2.0222e+06	9.02e+05	865.39
-2.0229e+06	9.0231e+05	910.01
-2.0236e+06	9.0263e+05	957.8
-2.0243e+06	9.0295e+05	1014.4
-2.025e+06	9.0326e+05	1089.9
-2.0257e+06	9.0358e+05	1171.9
-2.0264e+06	9.039e+05	1243.5
-2.0271e+06	9.0421e+05	1294.5
-2.0278e+06	9.0453e+05	1289.2
-2.0285e+06	9.0485e+05	1240.5
-2.0293e+06	9.0516e+05	1175.5
-2.03e+06	9.0548e+05	1130.6
-2.0307e+06	9.058e+05	1186.8
-2.0314e+06	9.0612e+05	1280.4
-2.0321e+06	9.0643e+05	1366.1
-2.0328e+06	9.0675e+05	1401.7
-2.0335e+06	9.0707e+05	1382.3
-2.0342e+06	9.0739e+05	1329.1
-2.0349e+06	9.077e+05	1264.9
-2.0357e+06	9.0802e+05	1198.6
-2.0364e+06	9.0834e+05	1122.3
-2.0371e+06	9.0866e+05	1042.6
-2.0378e+06	9.0898e+05	961.41
-2.0385e+06	9.093e+05	856.68
-2.0392e+06	9.0962e+05	746.78
-2.0399e+06	9.0993e+05	619.74
-2.0407e+06	9.1025e+05	466.78
-2.0414e+06	9.1057e+05	364.01
-2.0421e+06	9.1089e+05	333.59
-2.0428e+06	9.1121e+05	396.48
-2.0435e+06	9.1153e+05	477.57
-2.0442e+06	9.1185e+05	567.93
-2.045e+06	9.1217e+05	636.48
-2.0457e+06	9.1249e+05	707
-2.0464e+06	9.1281e+05	820.62
-2.0471e+06	9.1313e+05	943.11
-2.0478e+06	9.1345e+05	1009.6
-2.0485e+06	9.1377e+05	940.78
-2.0493e+06	9.1409e+05	744.81
-2.05e+06	9.1441e+05	521.75
-2.0507e+06	9.1473e+05	300.15
-2.0514e+06	9.1505e+05	100.84
-2.0521e+06	9.1537e+05	-37.56
-2.0529e+06	9.1569e+05	-162.61
-2.0536e+06	9.1601e+05	-253.88
-2.0543e+06	9.1633e+05	-291.63
-2.055e+06	9.1665e+05	-270.53
-2.0557e+06	9.1698e+05	-219.52
-2.0565e+06	9.173e+05	-168.23
-2.0572e+06	9.1762e+05	-105.92
-2.0579e+06	9.1794e+05	-29.85
-2.0586e+06	9.1826e+05	62.422
-2.0593e+06	9.1858e+05	179.47
-2.0601e+06	9.1891e+05	328.82
-2.0608e+06	9.1923e+05	517.4
-2.0615e+06	9.1955e+05	726.34
-2.0622e+06	9.1987e+05	910.74
-2.0629e+06	9.2019e+05	1054.7
-2.0637e+06	9.2052e+05	1055.3
-2.0644e+06	9.2084e+05	1130.5
-2.0651e+06	9.2116e+05	1164.5
-2.0658e+06	9.2149e+05	1021.4
-2.0666e+06	9.2181e+05	826.31
-2.0673e+06	9.2213e+05	689.82
-2.068e+06	9.2245e+05	708.77
-2.0687e+06	9.2278e+05	833.47
-2.0695e+06	9.231e+05	993.42
-2.0702e+06	9.2342e+05	1130
-2.0709e+06	9.2375e+05	1176.2
-2.0716e+06	9.2407e+05	1211
-2.0724e+06	9.244e+05	1248.7
-2.0731e+06	9.2472e+05	1299.9
-2.0738e+06	9.2504e+05	1326.5
-2.0745e+06	9.2537e+05	1340.1
-2.0753e+06	9.2569e+05	1343.1
-2.076e+06	9.2602e+05	1335.2
-2.0767e+06	9.2634e+05	1354.6
-2.0775e+06	9.2667e+05	1315
-2.0782e+06	9.2699e+05	1247
-2.0789e+06	9.2732e+05	1142.2
-2.0796e+06	9.2764e+05	1066.2
-2.0804e+06	9.2797e+05	1033.9
-2.0811e+06	9.2829e+05	1047.1
-2.0818e+06	9.2862e+05	1036.6
-2.0826e+06	9.2894e+05	997.99
-2.0833e+06	9.2927e+05	931.84
-2.084e+06	9.2959e+05	833.22
-2.0847e+06	9.2992e+05	704.01
-2.0855e+06	9.3024e+05	652.18
-2.0862e+06	9.3057e+05	626.42
-2.0869e+06	9.309e+05	586.71
-2.0877e+06	9.3122e+05	696.37
-2.0884e+06	9.3155e+05	792.06
-2.0891e+06	9.3188e+05	818.18
-2.0899e+06	9.322e+05	806.56
-2.0906e+06	9.3253e+05	921.82
-2.0913e+06	9.3286e+05	1108.1
-2.0921e+06	9.3318e+05	1317.7
-2.0928e+06	9.3351e+05	1477.5
-2.0935e+06	9.3384e+05	1578
-2.0943e+06	9.3416e+05	1636.4
-2.095e+06	9.3449e+05	1648.1
-2.0957e+06	9.3482e+05	1630.2
-2.0965e+06	9.3515e+05	1633.5
-2.0972e+06	9.3547e+05	1684
-2.0979e+06	9.358e+05	1637.7
-2.0987e+06	9.3613e+05	1644
-2.0994e+06	9.3646e+05	1610
-2.1001e+06	9.3679e+05	1570.8
-2.1009e+06	9.3711e+05	1510.6
-2.1016e+06	9.3744e+05	1522.2
-2.1024e+06	9.3777e+05	1579.3
-2.1031e+06	9.381e+05	1642.9
-2.1038e+06	9.3843e+05	1617
-2.1046e+06	9.3876e+05	1527.6
-2.1053e+06	9.3909e+05	1439
-2.106e+06	9.3942e+05	1417.9
-2.1068e+06	9.3975e+05	1461.3
-2.1075e+06	9.4007e+05	1498.5
-2.1083e+06	9.404e+05	1523.2
-2.109e+06	9.4073e+05	1529.6
-2.1097e+06	9.4106e+05	1560.4
-2.1105e+06	9.4139e+05	1577.6
-2.1112e+06	9.4172e+05	1579.8
-2.112e+06	9.4205e+05	1563
-2.1127e+06	9.4238e+05	1532.6
-2.1134e+06	9.4271e+05	1490.3
-2.1142e+06	9.4304e+05	1424.9
-2.1149e+06	9.4337e+05	1319.4
-2.1157e+06	9.437e+05	1212.1
-2.1164e+06	9.4404e+05	1128
-2.1171e+06	9.4437e+05	1086.4
-2.1179e+06	9.447e+05	1098.2
-2.1186e+06	9.4503e+05	1146.6
-2.1194e+06	9.4536e+05	1220.1
-2.1201e+06	9.4569e+05	1285.6
-2.1208e+06	9.4602e+05	1337.5
-2.1216e+06	9.4635e+05	1388.6
-2.1223e+06	9.4669e+05	1444.3
-2.1231e+06	9.4702e+05	1512.1
-2.1238e+06	9.4735e+05	1508.3
-2.1246e+06	9.4768e+05	1462.9
-2.1253e+06	9.4801e+05	1369.8
-2.1261e+06	9.4835e+05	1245
-2.1268e+06	9.4868e+05	1156.2
-2.1275e+06	9.4901e+05	1179.5
-2.1283e+06	9.4934e+05	1233
-2.129e+06	9.4968e+05	1286.6
-2.1298e+06	9.5001e+05	1304
-2.1305e+06	9.5034e+05	1294.8
-2.1313e+06	9.5067e+05	1269
-2.132e+06	9.5101e+05	1240.1
-2.1328e+06	9.5134e+05	1211
-2.1335e+06	9.5167e+05	1175.7
-2.1343e+06	9.5201e+05	1133.9
-2.135e+06	9.5234e+05	1076.6
-2.1358e+06	9.5267e+05	1025.9
-2.1365e+06	9.5301e+05	987.28
-2.1373e+06	9.5334e+05	955.6
-2.138e+06	9.5368e+05	915.86
-2.1388e+06	9.5401e+05	868.91
-2.1395e+06	9.5435e+05	817.77
-2.1403e+06	9.5468e+05	764.83
-2.141e+06	9.5501e+05	708.83
-2.1418e+06	9.5535e+05	611.85
-2.1425e+06	9.5568e+05	498.39
-2.1433e+06	9.5602e+05	367.53
-2.144e+06	9.5635e+05	224.56
-2.1448e+06	9.5669e+05	66.516
-2.1455e+06	9.5702e+05	-93.703
-2.1463e+06	9.5736e+05	-222.95
-2.147e+06	9.5769e+05	-277.21
-2.1478e+06	9.5803e+05	-228.84
-2.1485e+06	9.5837e+05	-108.73
-2.1493e+06	9.587e+05	61.785
-2.15e+06	9.5904e+05	268.79
-2.1508e+06	9.5937e+05	479.39
-2.1515e+06	9.5971e+05	649.6
-2.1523e+06	9.6005e+05	745.06
-2.153e+06	9.6038e+05	744.23
-2.1538e+06	9.6072e+05	669.66
-2.1546e+06	9.6106e+05	531.22
-2.1553e+06	9.6139e+05	364.92
-2.1561e+06	9.6173e+05	220.13
-2.1568e+06	9.6207e+05	150.49
-2.1576e+06	9.624e+05	134.55
-2.1583e+06	9.6274e+05	139.5
-2.1591e+06	9.6308e+05	145.55
-2.1598e+06	9.6342e+05	162.32
-2.1606e+06	9.6375e+05	193.72
-2.1614e+06	9.6409e+05	315.67
-2.1621e+06	9.6443e+05	513.33
-2.1629e+06	9.6477e+05	713.49
-2.1636e+06	9.6511e+05	905.25
-2.1644e+06	9.6544e+05	877.49
-2.1651e+06	9.6578e+05	826.73
-2.1659e+06	9.6612e+05	864.5
-2.1667e+06	9.6646e+05	922.93
-2.1674e+06	9.668e+05	1019.3
-2.1682e+06	9.6714e+05	1153.8
-2.1689e+06	9.6748e+05	1274.1
-2.1697e+06	9.6781e+05	1376.1
-2.1705e+06	9.6815e+05	1455.8
-2.1712e+06	9.6849e+05	1511.9
-2.172e+06	9.6883e+05	1535.6
-2.1727e+06	9.6917e+05	1514.8
-2.1735e+06	9.6951e+05	1468.6
-2.1743e+06	9.6985e+05	1433.9
-2.175e+06	9.7019e+05	1463.2
-2.1758e+06	9.7053e+05	1485.3
-2.1766e+06	9.7087e+05	1435.2
-2.1773e+06	9.7121e+05	1345
-2.1781e+06	9.7155e+05	1267.5
-2.1788e+06	9.7189e+05	1274.2
-2.1796e+06	9.7223e+05	1314.1
-2.1804e+06	9.7257e+05	1355.3
-2.1811e+06	9.7291e+05	1381.1
-2.1819e+06	9.7325e+05	1371.3
-2.1827e+06	9.736e+05	1329.8
-2.1834e+06	9.7394e+05	1277.6
-2.1842e+06	9.7428e+05	1224.6
-2.185e+06	9.7462e+05	1172.9
-2.1857e+06	9.7496e+05	1139.9
-2.1865e+06	9.753e+05	1112.4
-2.1873e+06	9.7564e+05	1084.1
-2.188e+06	9.7599e+05	1061
-2.1888e+06	9.7633e+05	1047.1
-2.1896e+06	9.7667e+05	1033.5
-2.1903e+06	9.7701e+05	1020.2
-2.1911e+06	9.7736e+05	1010.7
-2.1919e+06	9.777e+05	1017.9
-2.1926e+06	9.7804e+05	1029.9
-2.1934e+06	9.7838e+05	1034.8
-2.1942e+06	9.7873e+05	1032.4
-2.1949e+06	9.7907e+05	1017.5
-2.1957e+06	9.7941e+05	951.59
-2.1965e+06	9.7975e+05	883.07
-2.1972e+06	9.801e+05	814.52
-2.198e+06	9.8044e+05	746.83
-2.1988e+06	9.8079e+05	689.89
-2.1996e+06	9.8113e+05	642.09
-2.2003e+06	9.8147e+05	606.78
-2.2011e+06	9.8182e+05	587.17
-2.2019e+06	9.8216e+05	568.19
-2.2026e+06	9.825e+05	572.4
-2.2034e+06	9.8285e+05	603.42
-2.2042e+06	9.8319e+05	653.91
-2.205e+06	9.8354e+05	698.82
-2.2057e+06	9.8388e+05	716.38
-2.2065e+06	9.8423e+05	747.55
-2.2073e+06	9.8457e+05	784.08
-2.208e+06	9.8492e+05	813.24
-2.2088e+06	9.8526e+05	851.56
-2.2096e+06	9.8561e+05	887.8
-2.2104e+06	9.8595e+05	918.65
-2.2111e+06	9.863e+05	949.74
-2.2119e+06	9.8664e+05	974.27
-2.2127e+06	9.8699e+05	993.85
-2.2135e+06	9.8734e+05	1020.5
-2.2142e+06	9.8768e+05	1054.4
-2.215e+06	9.8803e+05	1095.4
-2.2158e+06	9.8837e+05	1139.2
-2.2166e+06	9.8872e+05	1169.7
-2.2173e+06	9.8907e+05	1177.5
-2.2181e+06	9.8941e+05	1154.5
-2.2189e+06	9.8976e+05	1124.4
-2.2197e+06	9.9011e+05	1119.7
-2.2205e+06	9.9045e+05	1115
-2.2212e+06	9.908e+05	1091.7
-2.222e+06	9.9115e+05	1035.4
-2.2228e+06	9.915e+05	953.52
-2.2236e+06	9.9184e+05	873.79
-2.2244e+06	9.9219e+05	833.54
-2.2251e+06	9.9254e+05	857.26
-2.2259e+06	9.9289e+05	904.47
-2.2267e+06	9.9323e+05	946.13
-2.2275e+06	9.9358e+05	968.18
-2.2283e+06	9.9393e+05	968.24
-2.229e+06	9.9428e+05	953.89
-2.2298e+06	9.9463e+05	946.42
-2.2306e+06	9.9497e+05	953.32
-2.2314e+06	9.9532e+05	968.47
-2.2322e+06	9.9567e+05	977.33
-2.2329e+06	9.9602e+05	982.29
-2.2337e+06	9.9637e+05	996.01
-2.2345e+06	9.9672e+05	1010.4
-2.2353e+06	9.9707e+05	1015.3
-2.2361e+06	9.9742e+05	1001.2
-2.2369e+06	9.9777e+05	975.4
-2.2376e+06	9.9812e+05	943.97
-2.2384e+06	9.9847e+05	951.55
-2.2392e+06	9.9882e+05	988.19
-2.24e+06	9.9917e+05	1012.8
-2.2408e+06	9.9952e+05	1047.4
-2.2416e+06	9.9987e+05	1074
-2.2423e+06	1.0002e+06	1080.6
-2.2431e+06	1.0006e+06	1084
-2.2439e+06	1.0009e+06	1105.7
-2.2447e+06	1.0013e+06	1132.5
-2.2455e+06	1.0016e+06	1162
-2.2463e+06	1.002e+06	1189.4
-2.2471e+06	1.0023e+06	1204.3
-2.2479e+06	1.0027e+06	1206.4
-2.2486e+06	1.003e+06	1210.3
-2.2494e+06	1.0034e+06	1201.9
-2.2502e+06	1.0037e+06	1174.1
-2.251e+06	1.0041e+06	1124.8
-2.2518e+06	1.0044e+06	1063.7
-2.2526e+06	1.0048e+06	1006.1
-2.2534e+06	1.0051e+06	965.75
-2.2542e+06	1.0055e+06	965.96
-2.255e+06	1.0058e+06	1006.8
-2.2557e+06	1.0062e+06	1050.8
-2.2565e+06	1.0065e+06	1087.9
-2.2573e+06	1.0069e+06	1113.6
-2.2581e+06	1.0072e+06	1126.1
-2.2589e+06	1.0076e+06	1117.7
-2.2597e+06	1.008e+06	1083.5
-2.2605e+06	1.0083e+06	1036.7
-2.2613e+06	1.0087e+06	993.82
-2.2621e+06	1.009e+06	968.01
-2.2629e+06	1.0094e+06	974.67
-2.2637e+06	1.0097e+06	981.01
-2.2645e+06	1.0101e+06	999.2
-2.2652e+06	1.0104e+06	1040
-2.266e+06	1.0108e+06	1078
-2.2668e+06	1.0111e+06	1092.6
-2.2676e+06	1.0115e+06	1104.9
-2.2684e+06	1.0118e+06	1098
-2.2692e+06	1.0122e+06	1077.8
-2.27e+06	1.0126e+06	1050.8
-2.2708e+06	1.0129e+06	1010.8
-2.2716e+06	1.0133e+06	977.56
-2.2724e+06	1.0136e+06	962.29
-2.2732e+06	1.014e+06	954.3
-2.274e+06	1.0143e+06	947.9
-2.2748e+06	1.0147e+06	974.35
-2.2756e+06	1.015e+06	1025.2
-2.2764e+06	1.0154e+06	1076.2
-2.2772e+06	1.0158e+06	1101.7
-2.278e+06	1.0161e+06	1079.9
-2.2788e+06	1.0165e+06	1051.2
-2.2796e+06	1.0168e+06	1041.6
-2.2804e+06	1.0172e+06	1031.5
-2.2812e+06	1.0175e+06	1018.8
-2.282e+06	1.0179e+06	1000.2
-2.2828e+06	1.0182e+06	1006.5
-2.2836e+06	1.0186e+06	997.61
-2.2844e+06	1.019e+06	994.6
-2.2852e+06	1.0193e+06	1005.7
-2.286e+06	1.0197e+06	1023
-2.2868e+06	1.02e+06	1045.6
-2.2876e+06	1.0204e+06	1065.7
-2.2884e+06	1.0207e+06	1112.6
-2.2892e+06	1.0211e+06	1191.8
-2.29e+06	1.0215e+06	1255.4
-2.2908e+06	1.0218e+06	1296.9
-2.2916e+06	1.0222e+06	1336.2
-2.2924e+06	1.0225e+06	1373.2
-2.2932e+06	1.0229e+06	1409
-2.294e+06	1.0233e+06	1442.8
-2.2948e+06	1.0236e+06	1480.8
-2.2956e+06	1.024e+06	1505.4
-2.2964e+06	1.0243e+06	1512.7
-2.2972e+06	1.0247e+06	1507.6
-2.298e+06	1.025e+06	1514.2
-2.2988e+06	1.0254e+06	1573.8
-2.2996e+06	1.0258e+06	1612.7
-2.3004e+06	1.0261e+06	1577.4
-2.3012e+06	1.0265e+06	1472.2
-2.302e+06	1.0268e+06	1362.4
-2.3028e+06	1.0272e+06	1274.4
-2.3037e+06	1.0276e+06	1200.6
-2.3045e+06	1.0279e+06	1119.9
-2.3053e+06	1.0283e+06	1089
-2.3061e+06	1.0286e+06	1131.7
-2.3069e+06	1.029e+06	1151.7
-2.3077e+06	1.0294e+06	1238.6
-2.3085e+06	1.0297e+06	1341.2
-2.3093e+06	1.0301e+06	1423.9
-2.3101e+06	1.0304e+06	1472.7
-2.3109e+06	1.0308e+06	1511.7
-2.3117e+06	1.0312e+06	1487.7
-2.3125e+06	1.0315e+06	1418.4
-2.3134e+06	1.0319e+06	1259.8
-2.3142e+06	1.0323e+06	976.97
-2.315e+06	1.0326e+06	777.72
-2.3158e+06	1.033e+06	886.69
-2.3166e+06	1.0333e+06	1137.6
-2.3174e+06	1.0337e+06	1381
-2.3182e+06	1.0341e+06	1535.1
-2.319e+06	1.0344e+06	1577.3
-2.3199e+06	1.0348e+06	1555.5
-2.3207e+06	1.0352e+06	1603.3
-2.3215e+06	1.0355e+06	1627.2
-2.3223e+06	1.0359e+06	1626.2
-2.3231e+06	1.0362e+06	1660.2
-2.3239e+06	1.0366e+06	1719.6
-2.3247e+06	1.037e+06	1703.7
-2.3255e+06	1.0373e+06	1689.8
-2.3264e+06	1.0377e+06	1689.3
-2.3272e+06	1.0381e+06	1686.2
-2.328e+06	1.0384e+06	1678
-2.3288e+06	1.0388e+06	1663.8
-2.3296e+06	1.0391e+06	1633.8
-2.3304e+06	1.0395e+06	1566.8
-2.3313e+06	1.0399e+06	1471.8
-2.3321e+06	1.0402e+06	1373.5
-2.3329e+06	1.0406e+06	1291.1
-2.3337e+06	1.041e+06	1231.1
-2.3345e+06	1.0413e+06	1176.4
-2.3353e+06	1.0417e+06	1128.9
-2.3362e+06	1.0421e+06	1074.9
-2.337e+06	1.0424e+06	993.02
-2.3378e+06	1.0428e+06	894.42
-2.3386e+06	1.0432e+06	796.35
-2.3394e+06	1.0435e+06	703.81
-2.3403e+06	1.0439e+06	616.05
-2.3411e+06	1.0443e+06	538.31
-2.3419e+06	1.0446e+06	466.86
-2.3427e+06	1.045e+06	399.93
-2.3435e+06	1.0454e+06	343.61
-2.3444e+06	1.0457e+06	294.55
-2.3452e+06	1.0461e+06	230.13
-2.346e+06	1.0465e+06	138.93
-2.3468e+06	1.0468e+06	41.741
-2.3476e+06	1.0472e+06	111.95
-2.3485e+06	1.0476e+06	90.598
-2.3493e+06	1.0479e+06	9.7949
-2.3501e+06	1.0483e+06	-11.151
-2.3509e+06	1.0487e+06	-12.553
-2.3518e+06	1.049e+06	-14.522
-2.3526e+06	1.0494e+06	-17.018
-2.3534e+06	1.0498e+06	-22.366
-2.3542e+06	1.0501e+06	-29.486
-2.3551e+06	1.0505e+06	-32.529
-2.3559e+06	1.0509e+06	-43.234
-2.3567e+06	1.0512e+06	-49.209
-2.3575e+06	1.0516e+06	-57.646
-2.3584e+06	1.052e+06	-62.323
-2.3592e+06	1.0523e+06	-65.125
-2.36e+06	1.0527e+06	-64.958
-2.3608e+06	1.0531e+06	-59.796
-2.3617e+06	1.0534e+06	-54.276
-2.3625e+06	1.0538e+06	-45.757
-2.3633e+06	1.0542e+06	-40.058
-2.3642e+06	1.0545e+06	-33.868
-2.365e+06	1.0549e+06	-33.02
-2.3658e+06	1.0553e+06	-25.741
-2.3666e+06	1.0557e+06	-21.003
-2.3675e+06	1.056e+06	-18.037
-2.3683e+06	1.0564e+06	-15.91
-2.3691e+06	1.0568e+06	-14.311
-2.37e+06	1.0571e+06	-12.908
-2.3708e+06	1.0575e+06	-11.707
-2.3716e+06	1.0579e+06	-10.431
-2.3724e+06	1.0582e+06	-10
-2.3733e+06	1.0586e+06	-10
-2.3741e+06	1.059e+06	-9.9478
-2.3749e+06	1.0594e+06	-9.586
-2.3758e+06	1.0597e+06	-9.8335
-2.3766e+06	1.0601e+06	-12.418
-2.3774e+06	1.0605e+06	-16.189
-2.3783e+06	1.0608e+06	-21.124
-2.3791e+06	1.0612e+06	-27.52
-2.3799e+06	1.0616e+06	-32.214
-2.3808e+06	1.062e+06	-35.699
-2.3816e+06	1.0623e+06	-38.625
-2.3824e+06	1.0627e+06	-39.329
-2.3833e+06	1.0631e+06	-39.061
-2.3841e+06	1.0635e+06	-39.861
-2.3849e+06	1.0638e+06	-45.638
-2.3858e+06	1.0642e+06	-62.715
-2.3866e+06	1.0646e+06	-79.865
-2.3875e+06	1.0649e+06	-97.892
-2.3883e+06	1.0653e+06	-112.76
-2.3891e+06	1.0657e+06	-128.24
-2.39e+06	1.0661e+06	-137.1
-2.3908e+06	1.0664e+06	-151.63
-2.3916e+06	1.0668e+06	-163.66
-2.3925e+06	1.0672e+06	-173.91
-2.3933e+06	1.0676e+06	-181.84
-2.3942e+06	1.0679e+06	-191.35
-2.395e+06	1.0683e+06	-192.11
-2.3958e+06	1.0687e+06	-196.5
-2.3967e+06	1.0691e+06	-191.29
-2.3975e+06	1.0694e+06	-187.02
-2.3983e+06	1.0698e+06	-181.65
-2.3992e+06	1.0702e+06	-172.76
-2.4e+06	1.0706e+06	-165.86
-2.4009e+06	1.0709e+06	-159.14
-2.4017e+06	1.0713e+06	-154.96
-2.4026e+06	1.0717e+06	-152.95
-2.4034e+06	1.0721e+06	-155.07
-2.4042e+06	1.0724e+06	-156.81
-2.4051e+06	1.0728e+06	-157.3
-2.4059e+06	1.0732e+06	-155.67
-2.4068e+06	1.0736e+06	-150.99
-2.4076e+06	1.0739e+06	-140.74
-2.4084e+06	1.0743e+06	-126.01
-2.4093e+06	1.0747e+06	-111.18
-2.4101e+06	1.0751e+06	-83.909
-2.411e+06	1.0754e+06	-5.9742
-2.4118e+06	1.0758e+06	-108.4
-2.4127e+06	1.0762e+06	-225.99
-2.4135e+06	1.0766e+06	-288.91
-2.4144e+06	1.0769e+06	-301.07
-2.4152e+06	1.0773e+06	-259.26
-2.4161e+06	1.0777e+06	-196.94
-2.4169e+06	1.0781e+06	-128.92
-2.4177e+06	1.0785e+06	-74.673
-2.4186e+06	1.0788e+06	-40.643
-2.4194e+06	1.0792e+06	-19.308
-2.4203e+06	1.0796e+06	-13.02
-2.4211e+06	1.08e+06	-10
-2.422e+06	1.0803e+06	-10
-2.4228e+06	1.0807e+06	-9.9998
-2.4237e+06	1.0811e+06	-2.1868
-2.4245e+06	1.0815e+06	16.421
-2.4254e+06	1.0819e+06	20.93
-2.4262e+06	1.0822e+06	7.8991
-2.4271e+06	1.0826e+06	-11.544
-2.4279e+06	1.083e+06	-14.598
-2.4288e+06	1.0834e+06	-22.426
-2.4296e+06	1.0838e+06	-34.513
-2.4305e+06	1.0841e+06	-46.356
-2.4313e+06	1.0845e+06	-46.811
-2.4322e+06	1.0849e+06	-32.894
-2.433e+06	1.0853e+06	-10.33
-2.4339e+06	1.0857e+06	16.935
-2.4347e+06	1.086e+06	45.514
-2.4356e+06	1.0864e+06	70.098
-2.4364e+06	1.0868e+06	90.396
-2.4373e+06	1.0872e+06	105.98
-2.4382e+06	1.0876e+06	115.89
-2.439e+06	1.0879e+06	125.04
-2.4399e+06	1.0883e+06	116.23
-2.4407e+06	1.0887e+06	100.69
-2.4416e+06	1.0891e+06	93.562
-2.4424e+06	1.0895e+06	77.085
-2.4433e+06	1.0898e+06	67.164
-2.4441e+06	1.0902e+06	59.374
-2.445e+06	1.0906e+06	38.111
-2.4459e+06	1.091e+06	28.045
-2.4467e+06	1.0914e+06	14.214
-2.4476e+06	1.0918e+06	16.418
-2.4484e+06	1.0921e+06	25.312
-2.4493e+06	1.0925e+06	14.529
-2.4501e+06	1.0929e+06	-17.08
-2.451e+06	1.0933e+06	-88.401
-2.4519e+06	1.0937e+06	-177.86
-2.4527e+06	1.0941e+06	-216.34
-2.4536e+06	1.0944e+06	-216.61
-2.4544e+06	1.0948e+06	-211.27
-2.4553e+06	1.0952e+06	-199.4
-2.4562e+06	1.0956e+06	-182.8
-2.457e+06	1.096e+06	-162.71
-2.4579e+06	1.0964e+06	-144.09
-2.4587e+06	1.0967e+06	-126
-2.4596e+06	1.0971e+06	-121.66
-2.4605e+06	1.0975e+06	-101.44
-2.4613e+06	1.0979e+06	-95.117
-2.4622e+06	1.0983e+06	-100.39
-2.463e+06	1.0987e+06	-111.88
-2.4639e+06	1.099e+06	-126.45
-2.4648e+06	1.0994e+06	-141.9
-2.4656e+06	1.0998e+06	-158.71
-2.4665e+06	1.1002e+06	-176.38
-2.4674e+06	1.1006e+06	-194.78
-2.4682e+06	1.101e+06	-213.24
-2.4691e+06	1.1014e+06	-232.34
-2.47e+06	1.1017e+06	-251.28
-2.4708e+06	1.1021e+06	-270.73
-2.4717e+06	1.1025e+06	-288.93
-2.4726e+06	1.1029e+06	-301.82
-2.4734e+06	1.1033e+06	-304.96
-2.4743e+06	1.1037e+06	-304.59
-2.4752e+06	1.1041e+06	-314.98
-2.476e+06	1.1044e+06	-337.14
-2.4769e+06	1.1048e+06	-348.92
-2.4778e+06	1.1052e+06	-349.42
-2.4786e+06	1.1056e+06	-358.49
-2.4795e+06	1.106e+06	-374.1
-2.4804e+06	1.1064e+06	-379.3
-2.4812e+06	1.1068e+06	-380.15
-2.4821e+06	1.1072e+06	-393.42
-2.483e+06	1.1075e+06	-409.96
-2.0141e+06	8.9922e+05	744.05
-2.0148e+06	8.9954e+05	733.14
-2.0155e+06	8.9985e+05	730.36
-2.0162e+06	9.0017e+05	725.31
-2.0169e+06	9.0049e+05	716.66
-2.0176e+06	9.008e+05	705.4
-2.0183e+06	9.0112e+05	696.35
-2.019e+06	9.0143e+05	704.82
-2.0197e+06	9.0175e+05	742.44
-2.0204e+06	9.0206e+05	783.36
-2.0211e+06	9.0238e+05	825.79
-2.0218e+06	9.027e+05	867.33
-2.0225e+06	9.0301e+05	909.77
-2.0233e+06	9.0333e+05	957.61
-2.024e+06	9.0365e+05	1015.1
-2.0247e+06	9.0396e+05	1093.8
-2.0254e+06	9.0428e+05	1176.7
-2.0261e+06	9.046e+05	1256.4
-2.0268e+06	9.0491e+05	1318.3
-2.0275e+06	9.0523e+05	1309.1
-2.0282e+06	9.0555e+05	1253.9
-2.0289e+06	9.0587e+05	1158.8
-2.0296e+06	9.0618e+05	1120.5
-2.0304e+06	9.065e+05	1173.3
-2.0311e+06	9.0682e+05	1280
-2.0318e+06	9.0714e+05	1354.9
-2.0325e+06	9.0745e+05	1371
-2.0332e+06	9.0777e+05	1347.5
-2.0339e+06	9.0809e+05	1295
-2.0346e+06	9.0841e+05	1225.8
-2.0353e+06	9.0873e+05	1161.2
-2.0361e+06	9.0905e+05	1096.2
-2.0368e+06	9.0936e+05	991.42
-2.0375e+06	9.0968e+05	904.98
-2.0382e+06	9.1e+05	824.32
-2.0389e+06	9.1032e+05	714.34
-2.0396e+06	9.1064e+05	619.53
-2.0403e+06	9.1096e+05	546.42
-2.0411e+06	9.1128e+05	501.62
-2.0418e+06	9.116e+05	544.36
-2.0425e+06	9.1192e+05	614.04
-2.0432e+06	9.1224e+05	637.24
-2.0439e+06	9.1256e+05	687.52
-2.0446e+06	9.1288e+05	753.9
-2.0454e+06	9.132e+05	780.1
-2.0461e+06	9.1352e+05	810.36
-2.0468e+06	9.1384e+05	933.08
-2.0475e+06	9.1416e+05	1063.3
-2.0482e+06	9.1448e+05	1093.9
-2.0489e+06	9.148e+05	823.2
-2.0497e+06	9.1512e+05	608.08
-2.0504e+06	9.1544e+05	405.18
-2.0511e+06	9.1576e+05	239.09
-2.0518e+06	9.1608e+05	83.265
-2.0525e+06	9.164e+05	-86.059
-2.0533e+06	9.1672e+05	-195.13
-2.054e+06	9.1704e+05	-227.66
-2.0547e+06	9.1737e+05	-208.6
-2.0554e+06	9.1769e+05	-172.68
-2.0561e+06	9.1801e+05	-124.83
-2.0569e+06	9.1833e+05	-61.053
-2.0576e+06	9.1865e+05	26.878
-2.0583e+06	9.1897e+05	139
-2.059e+06	9.193e+05	284.26
-2.0597e+06	9.1962e+05	463.98
-2.0605e+06	9.1994e+05	665.66
-2.0612e+06	9.2026e+05	863.8
-2.0619e+06	9.2059e+05	1037.4
-2.0626e+06	9.2091e+05	1174.7
-2.0634e+06	9.2123e+05	1214.9
-2.0641e+06	9.2155e+05	1185.4
-2.0648e+06	9.2188e+05	1129.5
-2.0655e+06	9.222e+05	958.58
-2.0662e+06	9.2252e+05	746.62
-2.067e+06	9.2285e+05	534.93
-2.0677e+06	9.2317e+05	638.64
-2.0684e+06	9.2349e+05	831.42
-2.0691e+06	9.2382e+05	1030.3
-2.0699e+06	9.2414e+05	1182
-2.0706e+06	9.2446e+05	1216.1
-2.0713e+06	9.2479e+05	1225.2
-2.072e+06	9.2511e+05	1245.5
-2.0728e+06	9.2544e+05	1341
-2.0735e+06	9.2576e+05	1373.2
-2.0742e+06	9.2609e+05	1338.1
-2.075e+06	9.2641e+05	1337.8
-2.0757e+06	9.2674e+05	1306
-2.0764e+06	9.2706e+05	1312.8
-2.0771e+06	9.2738e+05	1357.5
-2.0779e+06	9.2771e+05	1315.8
-2.0786e+06	9.2803e+05	1205.6
-2.0793e+06	9.2836e+05	1098.8
-2.08e+06	9.2869e+05	1068.7
-2.0808e+06	9.2901e+05	1131.7
-2.0815e+06	9.2934e+05	1150.1
-2.0822e+06	9.2966e+05	1130.7
-2.083e+06	9.2999e+05	1098.3
-2.0837e+06	9.3031e+05	996.19
-2.0844e+06	9.3064e+05	905.53
-2.0852e+06	9.3097e+05	830.93
-2.0859e+06	9.3129e+05	754.54
-2.0866e+06	9.3162e+05	767.81
-2.0873e+06	9.3195e+05	861.94
-2.0881e+06	9.3227e+05	938.59
-2.0888e+06	9.326e+05	896.27
-2.0895e+06	9.3293e+05	831.57
-2.0903e+06	9.3325e+05	892.01
-2.091e+06	9.3358e+05	1133.8
-2.0917e+06	9.3391e+05	1337.9
-2.0925e+06	9.3423e+05	1493.5
-2.0932e+06	9.3456e+05	1612.5
-2.0939e+06	9.3489e+05	1648.8
-2.0947e+06	9.3522e+05	1640
-2.0954e+06	9.3554e+05	1605.5
-2.0961e+06	9.3587e+05	1581.8
-2.0969e+06	9.362e+05	1688.4
-2.0976e+06	9.3653e+05	1598.3
-2.0983e+06	9.3686e+05	1555.3
-2.0991e+06	9.3718e+05	1545
-2.0998e+06	9.3751e+05	1494.5
-2.1006e+06	9.3784e+05	1427.1
-2.1013e+06	9.3817e+05	1437.5
-2.102e+06	9.385e+05	1552.5
-2.1028e+06	9.3883e+05	1650
-2.1035e+06	9.3916e+05	1643.3
-2.1042e+06	9.3949e+05	1567.2
-2.105e+06	9.3982e+05	1451.1
-2.1057e+06	9.4014e+05	1424.3
-2.1065e+06	9.4047e+05	1464.6
-2.1072e+06	9.408e+05	1526.8
-2.1079e+06	9.4113e+05	1563.2
-2.1087e+06	9.4146e+05	1568.4
-2.1094e+06	9.4179e+05	1590.5
-2.1101e+06	9.4212e+05	1619.3
-2.1109e+06	9.4245e+05	1602.5
-2.1116e+06	9.4278e+05	1566.7
-2.1124e+06	9.4311e+05	1527.3
-2.1131e+06	9.4344e+05	1480.2
-2.1138e+06	9.4378e+05	1398.8
-2.1146e+06	9.4411e+05	1283.8
-2.1153e+06	9.4444e+05	1157.4
-2.1161e+06	9.4477e+05	1043.5
-2.1168e+06	9.451e+05	1016.6
-2.1176e+06	9.4543e+05	1065
-2.1183e+06	9.4576e+05	1153.8
-2.119e+06	9.4609e+05	1269.4
-2.1198e+06	9.4642e+05	1355.7
-2.1205e+06	9.4676e+05	1414.4
-2.1213e+06	9.4709e+05	1452.8
-2.122e+06	9.4742e+05	1471.7
-2.1228e+06	9.4775e+05	1532.4
-2.1235e+06	9.4808e+05	1531.1
-2.1242e+06	9.4842e+05	1472.8
-2.125e+06	9.4875e+05	1402.2
-2.1257e+06	9.4908e+05	1283.5
-2.1265e+06	9.4941e+05	1189.3
-2.1272e+06	9.4975e+05	1160.1
-2.128e+06	9.5008e+05	1206.3
-2.1287e+06	9.5041e+05	1254.6
-2.1295e+06	9.5075e+05	1282.1
-2.1302e+06	9.5108e+05	1286.6
-2.1309e+06	9.5141e+05	1266.2
-2.1317e+06	9.5174e+05	1248.3
-2.1324e+06	9.5208e+05	1229.1
-2.1332e+06	9.5241e+05	1209.7
-2.1339e+06	9.5275e+05	1190.9
-2.1347e+06	9.5308e+05	1126.2
-2.1354e+06	9.5341e+05	1065
-2.1362e+06	9.5375e+05	1031.7
-2.1369e+06	9.5408e+05	1013.9
-2.1377e+06	9.5442e+05	968.9
-2.1384e+06	9.5475e+05	917.98
-2.1392e+06	9.5509e+05	859.95
-2.1399e+06	9.5542e+05	793.41
-2.1407e+06	9.5575e+05	726.77
-2.1414e+06	9.5609e+05	632.65
-2.1422e+06	9.5642e+05	509.05
-2.1429e+06	9.5676e+05	369.23
-2.1437e+06	9.571e+05	218.3
-2.1444e+06	9.5743e+05	56.977
-2.1452e+06	9.5777e+05	-108.54
-2.1459e+06	9.581e+05	-253.48
-2.1467e+06	9.5844e+05	-283.47
-2.1474e+06	9.5877e+05	-238.23
-2.1482e+06	9.5911e+05	-129.54
-2.1489e+06	9.5945e+05	34.599
-2.1497e+06	9.5978e+05	234.62
-2.1505e+06	9.6012e+05	437.97
-2.1512e+06	9.6045e+05	627.91
-2.152e+06	9.6079e+05	716.25
-2.1527e+06	9.6113e+05	704.06
-2.1535e+06	9.6146e+05	592.38
-2.1542e+06	9.618e+05	438.07
-2.155e+06	9.6214e+05	246.7
-2.1557e+06	9.6248e+05	78.47
-2.1565e+06	9.6281e+05	-4.0282
-2.1572e+06	9.6315e+05	16.909
-2.158e+06	9.6349e+05	116.26
-2.1588e+06	9.6383e+05	202.33
-2.1595e+06	9.6416e+05	288.61
[truncated: 273,086 more rows]
